# Supplementary material for: KCNK3 Mutation Causes Altered Immune Function in Pulmonary Arterial Hypertension Patients and Mouse Models
Source: MDPI journal article supplement (doi:10.3390/ijms22095014), 2021-05-09
Supplement: s1 [file s1]

## Online Supplement

### **KCNK3 Mutation Causes Altered Immune Function in Pulmonary Arterial Hypertension Patients and Mouse Models**

James D. West<sup>1</sup>, Eric D. Austin<sup>2</sup>, Elise M. Rizzi<sup>3</sup>, Ling Yan<sup>2</sup>, Harikrishna Tanjore<sup>1</sup>, Amber L. Crabtree<sup>1</sup>, Christy S. Moore<sup>1</sup>, Gladson Muthian<sup>4</sup>, Erica J. Carrier<sup>1</sup>, David A. Jacobson<sup>5</sup>, Rizwan Hamid<sup>2</sup>, Peggy L. Kendall<sup>3</sup>, Susan Majka<sup>6</sup>, Anandharajan Rathinasabapathy<sup>1</sup>

<sup>1</sup> Division of Allergy, Pulmonary and Critical Care Medicine, Department of Medicine, Vanderbilt University Medical Center, Nashville, USA

<sup>2</sup> Department of Pediatrics, Vanderbilt University Medical Center, Nashville, USA

<sup>3</sup> Division of Allergy and Immunology, Department of Medicine, Washington University in St. Louis, St. Louis, USA

<sup>4</sup> Department of Cancer Biology, Biochemistry and Neuropharmacology, School of Medicine, Meharry Medical College, Nashville, USA

<sup>5</sup> Department of Molecular Physiology and Biophysics, Vanderbilt University, Nashville, USA

<sup>6</sup> Division of Pulmonary, Critical Care and Sleep Medicine, Department of Medicine, National Jewish Health, Denver, USA

#### **Corresponding author:**

Anandharajan Rathinasabapathy PhD  
Vanderbilt University Medical Center

1161 21st Ave S

T-1218 MCN

Nashville, TN 37232-2650

phone: 615 343-3311

fax: 615 343-3480

[anandharajan.rathinasabapathy@vumc.org](mailto:anandharajan.rathinasabapathy@vumc.org)

## Supplemental Figures

Figure S1. IHC assessment of CD3 $\epsilon$  in mouse lung tissue samples

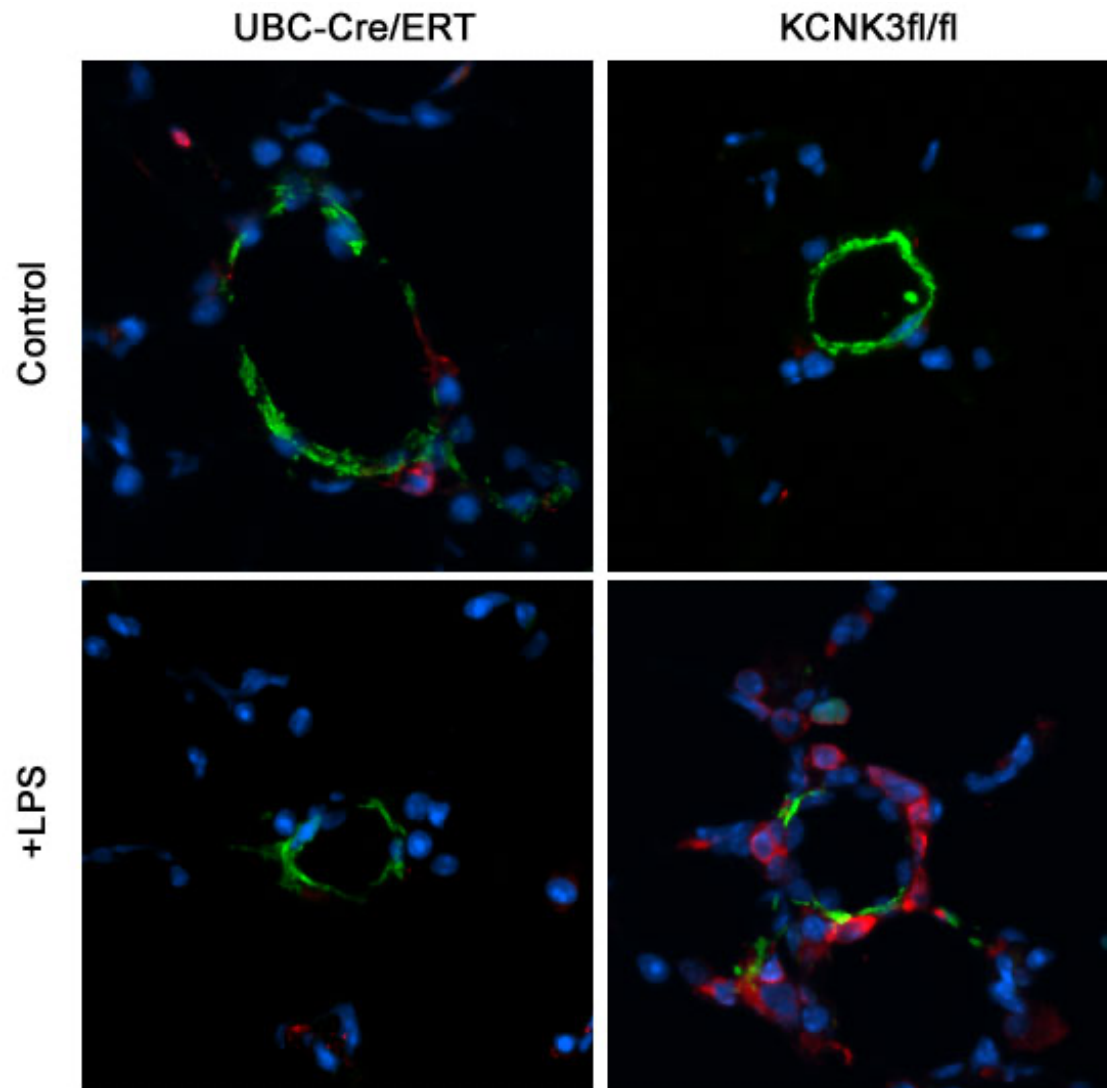

IHC assessment on mouse tissue samples validate the role of inflammation in driving KCNK3-PAH. Immunofluorescence depicting increased numbers of CD3 $\epsilon$ <sup>+</sup> cells (red) around the muscularized vessels (green) in UBC-Cre/ERT2 *kcnk3<sup>fl/fl</sup>* mice treated with low dose LPS – these are less common in other conditions. Nucleus is stained in blue. Images are magnified at 400X.

**Figure S2. Live White Blood Cell viSNE expression heatmaps (concatenated files)**

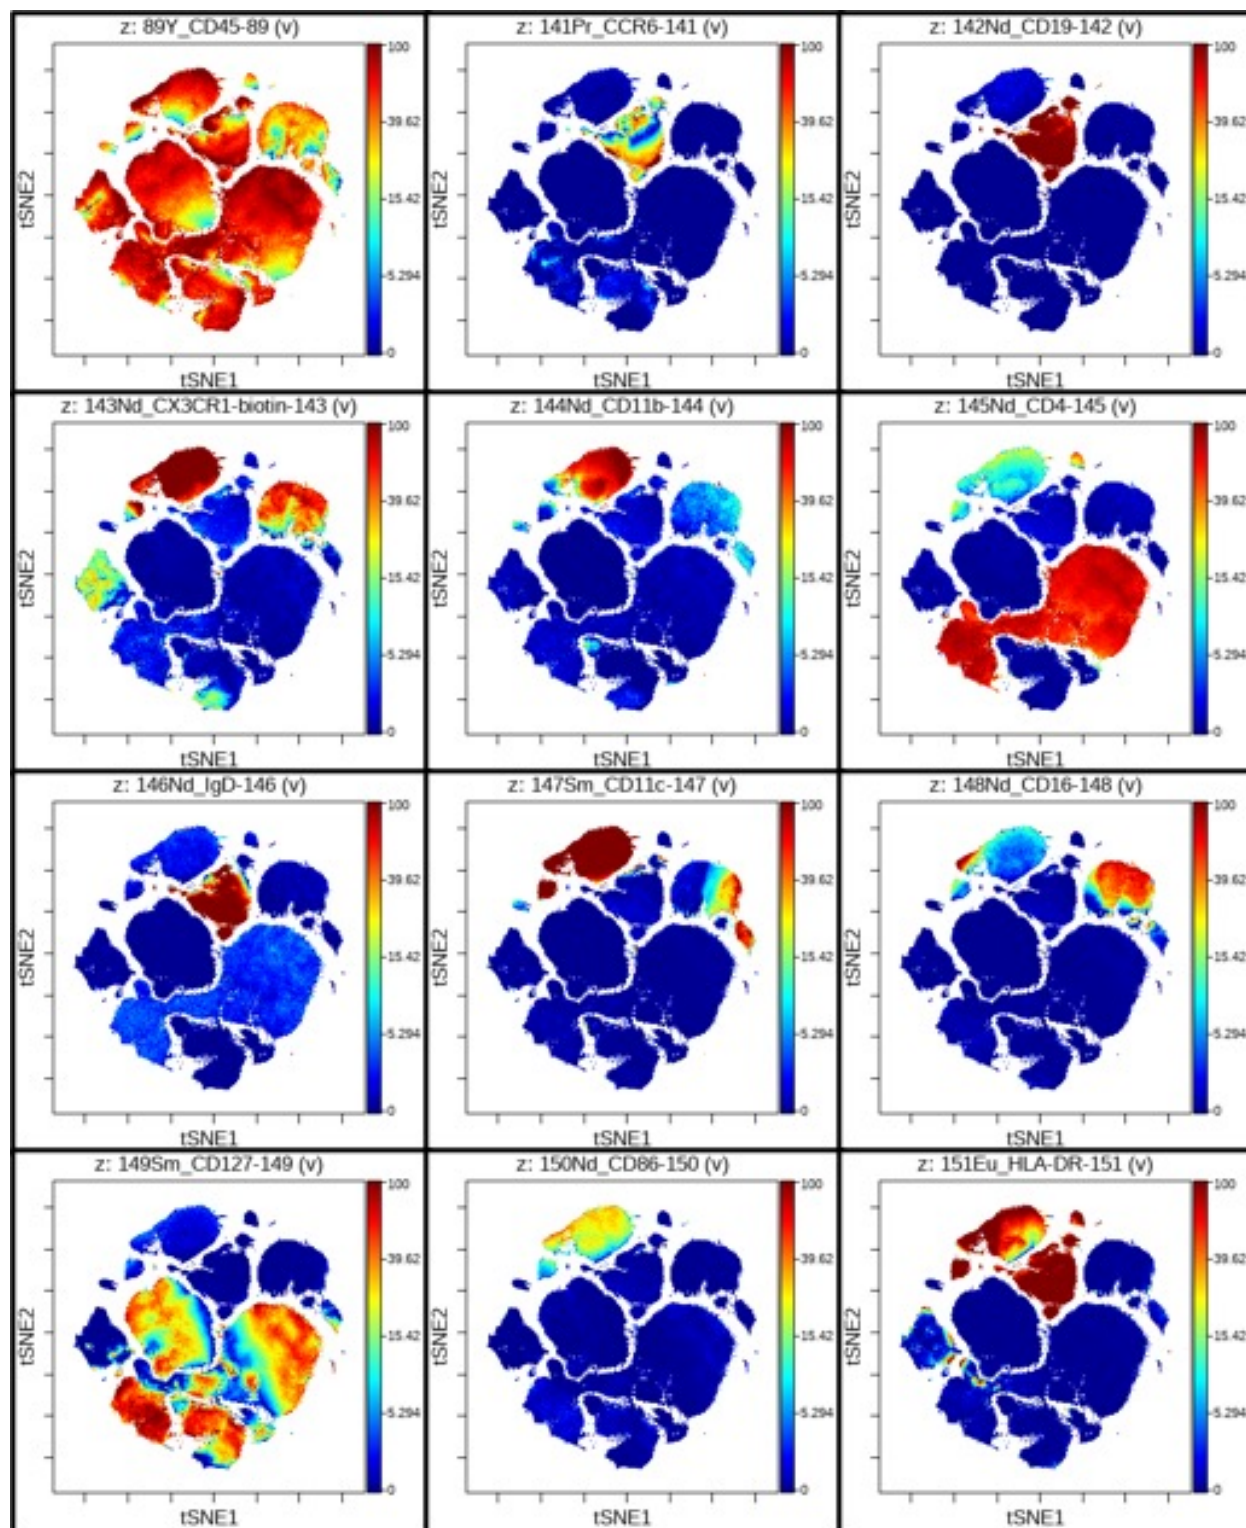

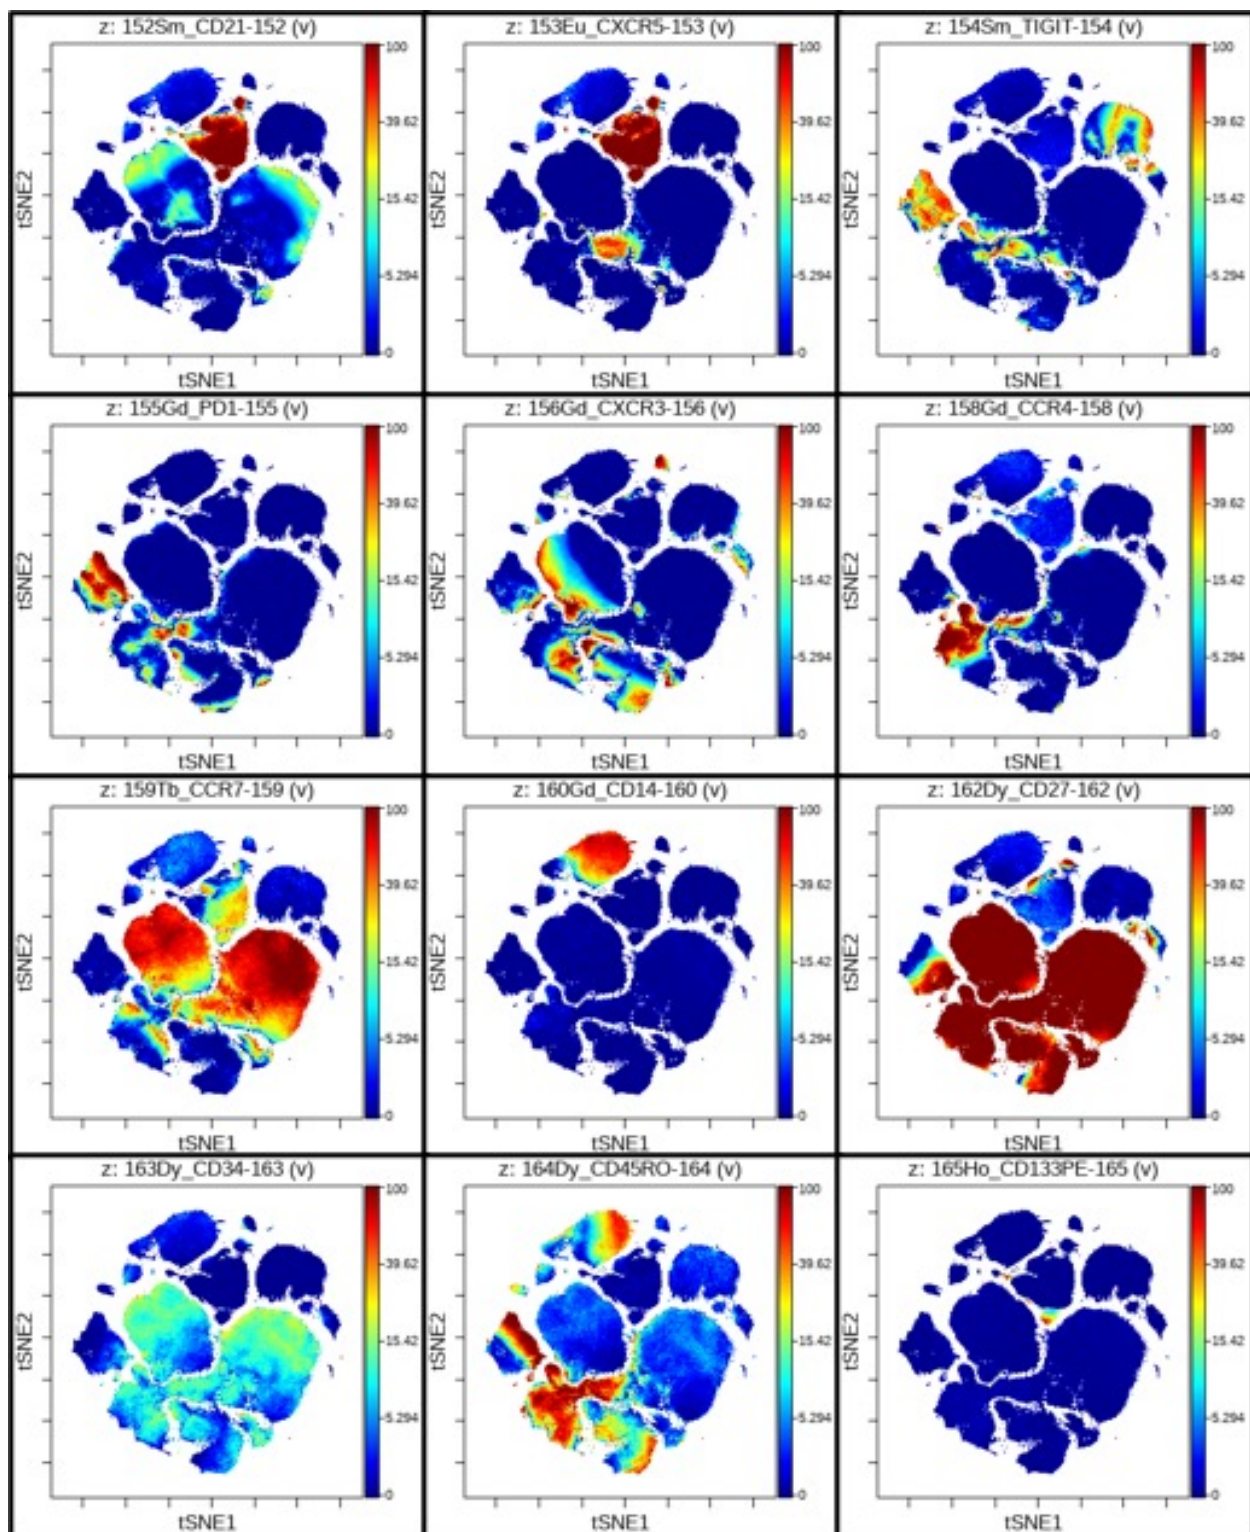



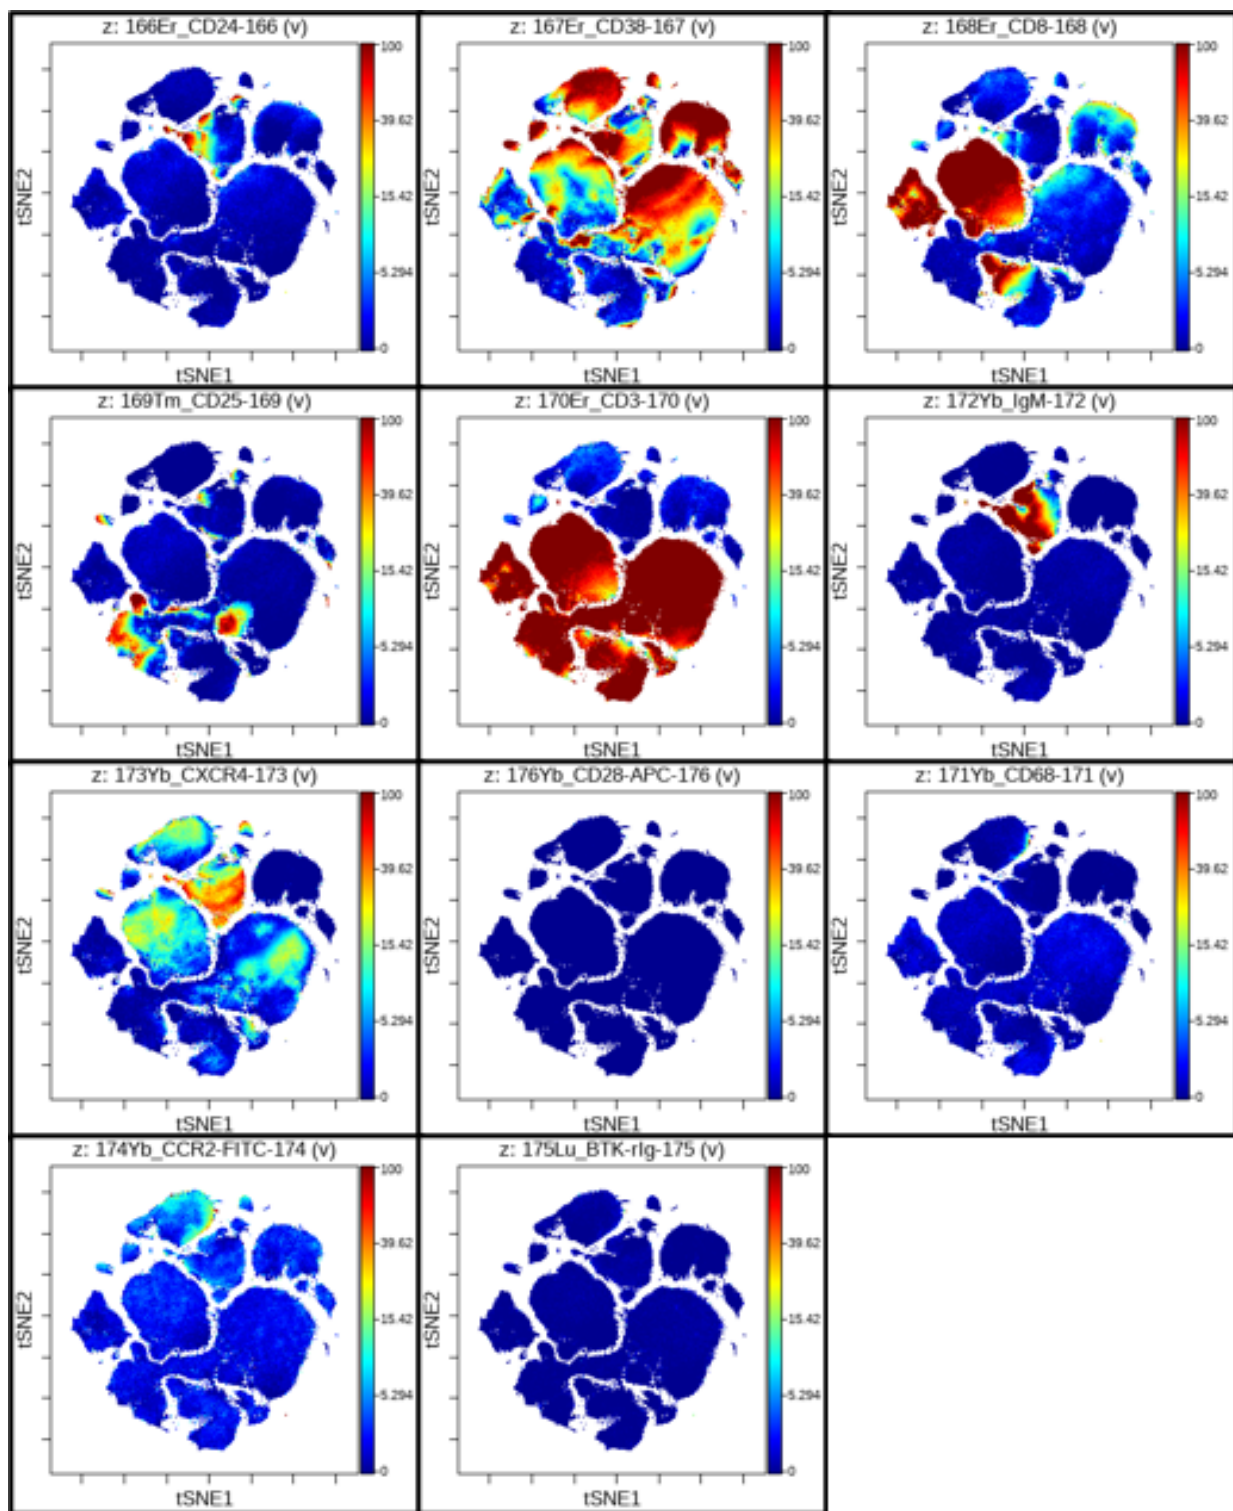

**Figure S3. CyTOF assessment of human PBMCs suggest the activation of Innate immune responses in KCNK3-HPAH patients**

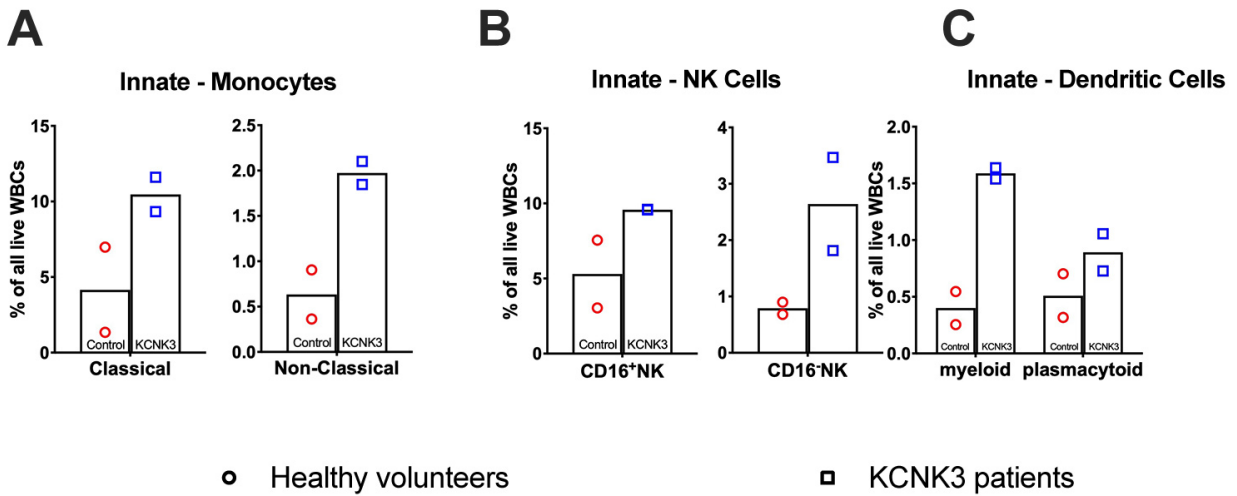

CytoTOF assessment on human PBMCs demonstrated a 2-3x increase of innate immune components – classical and non-classical monocytes, CD16<sup>+</sup> and CD16<sup>-</sup> NK cells, and also dendritic cells (both myeloid and plasmacytoid) in KCNK3-HPAH patients.

## Supplemental Table

**Table S1. Gene Ontology of iPS Microarray**

| Probe Set ID | Gene Symbol | Control 1 | Control 2 | KCNK3 mutant | mRNA Accession |
|--------------|-------------|-----------|-----------|--------------|----------------|
| 8147837      | ZFPM2       | 3.753788  | 3.678257  | 6.14383      | NM_012082      |
| 8116818      | BMP6        | 3.767481  | 3.767481  | 6.720144     | NM_001718      |
| 8102532      | PDE5A       | 3.836234  | 3.836234  | 5.256213     | NM_001083      |
| 8105267      | ITGA2       | 3.869874  | 4.772655  | 6.09214      | NM_002203      |
| 8151931      | TSPYL5      | 3.871941  | 4.350015  | 6.135015     | NM_033512      |
| 8132250      | BMPER       | 3.906456  | 4.665087  | 6.831632     | NM_133468      |
| 8154692      | TEK         | 3.938014  | 4.757459  | 6.053513     | NM_000459      |
| 8138689      | SKAP2       | 3.95428   | 4.662279  | 6.095451     | NM_001303468   |
| 8104758      | NPR3        | 4.054159  | 4.269153  | 5.217735     | NM_000908      |
| 7979241      | BMP4        | 4.100423  | 4.100423  | 5.939707     | NM_001202      |
| 8121850      | HEY2        | 4.145161  | 3.968143  | 5.13365      | NM_012259      |
| 7962212      | PKP2        | 4.601914  | 5.21813   | 7.149449     | NM_001005242   |
| 8091698      | SHOX2       | 4.647913  | 4.647913  | 5.937673     | NM_001163678   |
| 7970949      | MAB21L1     | 4.853406  | 5.387149  | 3.272384     | NM_005584      |
| 7923086      | ASPM        | 4.943844  | 5.437356  | 3.84633      | NM_001206846   |
| 7922976      | PTGS2       | 5.08736   | 5.981365  | 3.949162     | NM_000963      |
| 8155214      | MELK        | 5.108953  | 5.253481  | 3.980186     | NM_001256685   |
| 8097628      | HHIP        | 5.276442  | 6.571479  | 8.17002      | NM_022475      |
| 7929078      | KIF20B      | 5.283451  | 5.621128  | 4.069167     | NM_001284259   |
| 8151890      | TP53INP1    | 5.398271  | 5.684606  | 6.72948      | NM_001135733   |
| 8160441      | CDKN2A      | 5.405371  | 6.286618  | 7.110746     | NM_000077      |
| 8014591      | HNF1B       | 5.409317  | 5.157039  | 4.133977     | NM_000458      |
| 7979307      | DLGAP5      | 5.446868  | 6.333407  | 4.598376     | NM_001146015   |
| 8103728      | HMGB2       | 5.505724  | 6.224369  | 4.825548     | NM_001130688   |
| 8003322      | CYBA        | 5.524947  | 5.353505  | 6.568742     | NM_000101      |
| 8059376      | SERPINE2    | 5.621711  | 6.705077  | 7.794783     | NM_001136528   |
| 7901010      | KIF2C       | 5.636137  | 5.622636  | 4.457448     | NM_001297655   |

|         |        |          |          |          |              |
|---------|--------|----------|----------|----------|--------------|
| 7926259 | MCM10  | 5.736029 | 6.203403 | 4.849039 | NM_018518    |
| 7909708 | CENPF  | 5.79323  | 5.969531 | 4.298212 | NM_016343    |
| 8144153 | NCAPG2 | 5.795675 | 6.171447 | 4.87952  | NM_001281932 |
| 8175217 | GPC4   | 5.863088 | 5.970106 | 4.770126 | NM_001448    |
| 7929032 | FAS    | 5.89383  | 6.509405 | 7.874172 | NM_000043    |
| 8001133 | SHCBP1 | 5.92767  | 6.45394  | 5.09224  | NM_024745    |
| 8110084 | MSX2   | 6.030248 | 5.542302 | 4.6626   | NM_002449    |
| 8123864 | TFAP2A | 6.066299 | 7.289571 | 4.622367 | NM_001032280 |
| 7950555 | LRRC32 | 6.104    | 7.3752   | 8.674616 | NM_001128922 |
| 8147777 | CTHRC1 | 6.108233 | 6.072557 | 7.119371 | NM_001256099 |
| 8054580 | BUB1   | 6.180406 | 6.921506 | 5.317943 | NM_001278616 |
| 8017262 | BRIP1  | 6.182948 | 6.46583  | 5.283368 | NM_032043    |
| 8132118 | AQP1   | 6.307012 | 7.359815 | 4.749716 | NM_001185060 |
| 8007071 | CDC6   | 6.339029 | 6.576197 | 4.692752 | NM_001254    |
| 7999387 | EMP2   | 6.341525 | 6.493083 | 4.880129 | NM_001424    |
| 8021418 | MALT1  | 6.405386 | 6.026776 | 5.133571 | NM_006785    |
| 7985285 | ARNT2  | 6.516064 | 5.323734 | 4.196272 | NM_014862    |
| 7960340 | FOXM1  | 6.610526 | 6.677169 | 5.407912 | NM_001243088 |
| 8012403 | AURKB  | 6.772769 | 7.014205 | 5.745514 | NM_001256834 |
| 8015412 | JUP    | 6.854382 | 7.575547 | 8.795095 | NM_002230    |
| 7900699 | CDC20  | 6.876464 | 7.557014 | 6.038435 | NM_001255    |
| 7937020 | MKI67  | 6.987939 | 7.336534 | 5.973728 | NM_001145966 |
| 8141395 | MCM7   | 7.124069 | 7.22803  | 6.039013 | NM_001278595 |
| 8066822 | SULF2  | 7.295147 | 7.221128 | 6.206872 | NM_001161841 |
| 8039484 | IL11   | 7.597742 | 6.657686 | 5.072037 | NM_000641    |
| 8137526 | INSIG1 | 7.694956 | 7.303686 | 5.959184 | NM_005542    |
| 7977397 | CRIP2  | 7.732655 | 7.478788 | 8.912133 | NM_001270837 |
| 8160452 | CDKN2B | 7.976059 | 8.152885 | 9.333387 | NM_004936    |
| 8131803 | IL6    | 8.02247  | 8.191318 | 4.911787 | NM_000600    |
| 8139488 | IGFBP3 | 8.174747 | 8.573958 | 9.554642 | NM_000598    |
| 7994109 | PLK1   | 8.364383 | 8.736185 | 7.011639 | NM_005030    |



|         |             |          |          |          |              |
|---------|-------------|----------|----------|----------|--------------|
| 8075310 | LIF         | 8.520697 | 7.815692 | 6.476033 | NM_001257135 |
| 7931097 | HTRA1       | 8.542815 | 8.583393 | 9.595797 | NM_002775    |
| 8152617 | HAS2        | 8.588274 | 6.542852 | 4.092417 | NM_005328    |
| 8163637 | TNC         | 9.691027 | 8.838282 | 7.285433 | NM_002160    |
| 7961514 | MGP         | 2.687491 | 4.406413 | 7.548132 | NM_000900    |
| 8120932 | PRSS35      | 2.75527  | 3.319588 | 5.172153 | NM_001170423 |
| 8094870 | SHISA3      | 2.864613 | 4.569277 | 7.314581 | NM_001080505 |
| 8122860 | MYCT1       | 3.106201 | 3.392666 | 7.937538 | NM_025107    |
| 7982008 | SNORD115-1  | 3.174843 | 3.291023 | 5.064928 | NR_001291    |
| 7982032 | SNORD115-1  | 3.174843 | 3.291023 | 5.064928 | NR_001291    |
| 7982038 | SNORD115-1  | 3.174843 | 3.291023 | 5.064928 | NR_001291    |
| 7982018 | SNORD115-1  | 3.317688 | 3.206405 | 5.043474 | NR_001291    |
| 8091306 | PLSCR4      | 3.350403 | 3.474069 | 5.256557 | NM_001128304 |
| 7982090 | SNORD115-1  | 3.350403 | 3.22574  | 5.108373 | NR_001291    |
| 8171921 | DMD         | 3.370805 | 3.937013 | 5.350054 | NM_000109    |
| 7965410 | DCN         | 3.578554 | 3.405142 | 6.434369 | NM_001920    |
| 7961365 | MANSC1      | 3.592233 | 4.358784 | 6.209813 | NM_018050    |
| 7982006 | SNORD116-29 | 3.599633 | 3.173689 | 4.624912 | NR_003360    |
| 8111255 | CDH10       | 3.673683 | 3.562248 | 5.453468 | NM_006727    |
| 8154135 | SLC1A1      | 3.686099 | 4.6404   | 6.031627 | NM_004170    |
| 8008819 | YPEL2       | 3.686474 | 4.204033 | 5.071095 | NM_001005404 |
| 7934997 | PPP1R3C     | 3.71704  | 3.815421 | 5.075673 | NM_005398    |
| 8071044 | TEKT4P2     | 3.793409 | 3.324506 | 6.080981 | NR_038327    |
| 8140668 | SEMA3A      | 3.819222 | 4.367931 | 5.142897 | NM_006080    |
| 8037251 | PSG7        | 3.823463 | 3.746312 | 5.713368 | NM_001206650 |
| 8177120 | TEKT4P2     | 3.858858 | 3.986691 | 5.206972 | NR_038327    |
| 7937039 | EBF3        | 3.880946 | 4.354321 | 5.281522 | NM_001005463 |
| 8103695 | MFAP3L      | 3.892884 | 4.373666 | 5.170141 | NM_001009554 |
| 7951372 | CASP4       | 3.959921 | 4.428205 | 5.480414 | NM_001225    |
| 8071051 | TEKT4P2     | 3.97568  | 3.526222 | 6.014978 | NR_038327    |
| 8057771 | STAT4       | 3.983449 | 4.534959 | 5.855446 | NM_001243835 |

|         |              |          |          |          |              |
|---------|--------------|----------|----------|----------|--------------|
| 8093166 | PIGZ         | 4.019444 | 4.094553 | 5.116675 | NM_025163    |
| 8058063 | RFTN2        | 4.025315 | 4.223752 | 5.449033 | NM_144629    |
| 7903227 | PALMD        | 4.041473 | 4.088499 | 5.387241 | NM_017734    |
| 7913593 | TCEA3        | 4.041473 | 4.433648 | 5.252097 | NM_003196    |
| 8132710 | C7orf69      | 4.045653 | 4.65313  | 5.694642 | NM_001302627 |
| 7969933 | BIVM         | 4.086177 | 3.580841 | 5.031815 | AK126520     |
| 8126853 | PTCHD4       | 4.114315 | 4.278626 | 5.931394 | NM_001013732 |
| 8104107 | TRIML2       | 4.15382  | 4.188099 | 5.927236 | NM_001303419 |
| 8144802 | PDGFRL       | 4.160328 | 4.507992 | 6.426348 | NM_006207    |
| 7939007 | LUZP2        | 4.174322 | 3.863904 | 6.507897 | NM_001009909 |
| 7976816 | SNORD114-3   | 4.181602 | 2.264039 | 8.074939 | NR_003195    |
| 7982084 | SNORD115-1   | 4.185841 | 4.042267 | 6.850734 | NR_001291    |
| 7926127 | CELF2        | 4.235732 | 3.836234 | 5.121476 | NM_001025076 |
| 8074606 | USP41        | 4.24402  | 4.24402  | 5.304937 | XM_006724407 |
| 7987405 | RASGRP1      | 4.254426 | 4.443706 | 5.398895 | NM_001128602 |
| 8151369 | SBSPON       | 4.277519 | 5.68586  | 8.40913  | NM_153225    |
| 8065537 | LOC100134868 | 4.339894 | 4.718232 | 3.372141 | NR_004846    |
| 8074168 | LINC01296    | 4.340918 | 4.254585 | 5.370951 | NR_122112    |
| 7977452 | LINC01296    | 4.401941 | 4.416226 | 5.806    | NR_122112    |
| 8084891 | FAM43A       | 4.456332 | 5.632363 | 7.231817 | NM_153690    |
| 8172425 | SLC38A5      | 4.473644 | 3.962887 | 5.223432 | NM_033518    |
| 8102200 | DKK2         | 4.486034 | 3.882394 | 5.335907 | NM_014421    |
| 7906264 | PEAR1        | 4.557213 | 5.39544  | 6.429925 | NM_001080471 |
| 8047784 | ZDBF2        | 4.578517 | 5.402641 | 6.229595 | NM_001285549 |
| 8019857 | NDC80        | 4.579016 | 5.079308 | 3.714298 | NM_006101    |
| 8084717 | ST6GAL1      | 4.57989  | 5.216748 | 6.305926 | NM_003032    |
| 8128565 | POPDC3       | 4.664339 | 4.872491 | 3.60953  | NM_022361    |
| 8088602 | MAGI1        | 4.688179 | 5.045355 | 6.04172  | NM_001033057 |
| 8045148 | MZT2B        | 4.711442 | 4.548017 | 5.670253 | XM_011511889 |
| 8055284 | MZT2B        | 4.711442 | 4.548017 | 5.670253 | XM_011511889 |
| 7942941 | CCDC81       | 4.719901 | 4.791894 | 6.001727 | NM_001156474 |

|         |              |          |          |          |              |
|---------|--------------|----------|----------|----------|--------------|
| 8005171 | TRPV2        | 4.722057 | 4.853652 | 6.194136 | NM_016113    |
| 8083494 | MME          | 4.743834 | 4.606383 | 3.567095 | NM_000902    |
| 7976073 | FLRT2        | 4.752108 | 5.071802 | 6.184301 | NM_013231    |
| 7985213 | CHRNA5       | 4.764605 | 5.34329  | 3.763995 | NM_000745    |
| 7927099 | LINC00839    | 4.779306 | 4.602592 | 6.025829 | NR_026827    |
| 8144786 | SLC7A2       | 4.788666 | 6.418729 | 7.950139 | NM_001008539 |
| 8144036 | XRCC2        | 4.8424   | 5.219393 | 3.802933 | NM_005431    |
| 8077731 | FANCD2       | 4.846626 | 5.465368 | 4.144672 | NM_001018115 |
| 7927606 | PRKG1        | 4.848463 | 5.045356 | 6.173856 | NM_001098512 |
| 7954065 | GPRC5A       | 4.906563 | 5.374654 | 6.483192 | NM_003979    |
| 8123637 | HTATSFP2     | 4.93336  | 5.702828 | 6.741109 | NR_033884    |
| 8097973 | GUCY1B3      | 4.947127 | 4.450735 | 3.488162 | NM_000857    |
| 8145570 | ESCO2        | 4.947631 | 5.476889 | 4.055732 | NM_001017420 |
| 8146967 | CRISPLD1     | 4.969331 | 4.969331 | 6.330464 | NM_001286777 |
| 7920278 | S100A3       | 4.971665 | 4.746975 | 6.290259 | NM_002960    |
| 8037283 | PSG4         | 5.010054 | 4.474876 | 8.656805 | NM_001276495 |
| 8031646 | ZNF667-AS1   | 5.012279 | 6.079345 | 3.427373 | NR_036521    |
| 8020495 | CABLES1      | 5.021638 | 5.345322 | 6.498011 | NM_001100619 |
| 8058450 | GPR1         | 5.104096 | 5.815599 | 6.761907 | NM_001098199 |
| 7940530 | MYRF         | 5.107993 | 5.834551 | 6.594298 | NM_001127392 |
| 8034772 | ASF1B        | 5.121846 | 5.580302 | 4.334764 | NM_018154    |
| 8061483 | LOC100134868 | 5.141119 | 5.096106 | 4.006495 | NR_004846    |
| 8066925 | PTGIS        | 5.171101 | 5.171101 | 7.882372 | NM_000961    |
| 8151816 | GEM          | 5.177461 | 5.415296 | 7.498481 | NM_005261    |
| 8151871 | CCNE2        | 5.17755  | 5.326646 | 3.836372 | NM_057749    |
| 7981990 | SNORD116-21  | 5.177966 | 4.575421 | 3.386732 | NR_003335    |
| 7982663 | PAK6         | 5.202819 | 5.345925 | 3.794493 | NM_001128628 |
| 8145977 | PLEKHA2      | 5.257662 | 5.939379 | 6.634385 | NM_021623    |
| 8124391 | HIST1H2AB    | 5.264209 | 6.099003 | 4.488202 | NM_003513    |
| 8064894 | LRRN4        | 5.282812 | 5.417805 | 4.233436 | NM_152611    |
| 7940147 | FAM111B      | 5.287727 | 5.748823 | 4.413286 | NM_001142703 |

|         |          |          |          |          |              |
|---------|----------|----------|----------|----------|--------------|
| 8013671 | SPAG5    | 5.303306 | 5.474633 | 4.05334  | NM_006461    |
| 8027247 | ZNF93    | 5.320086 | 5.880729 | 4.342234 | NM_031218    |
| 8099132 | CYTL1    | 5.34528  | 5.350237 | 6.645666 | NM_018659    |
| 7913566 | HTR1D    | 5.352677 | 5.44017  | 6.508722 | NM_000864    |
| 7957850 | GAS2L3   | 5.379246 | 5.969814 | 4.37772  | NM_001303130 |
| 7929258 | KIF11    | 5.384888 | 5.8471   | 4.315806 | NM_004523    |
| 7908204 | HMCN1    | 5.441696 | 5.547084 | 6.766784 | NM_031935    |
| 8109305 | SYNPO    | 5.450247 | 5.527963 | 6.718337 | NM_001109974 |
| 8092095 | TNIK     | 5.492445 | 5.282734 | 3.520928 | NM_001161560 |
| 8061247 | RIN2     | 5.495635 | 6.138115 | 7.879323 | NM_001242581 |
| 8073573 | FAM109B  | 5.504136 | 5.580298 | 6.893072 | NM_001002034 |
| 7927631 | DKK1     | 5.540877 | 6.521642 | 8.028819 | NM_012242    |
| 7899615 | SERINC2  | 5.564854 | 6.225732 | 7.040218 | NM_001199037 |
| 8097356 | PLK4     | 5.590448 | 5.877633 | 4.230494 | NM_001190799 |
| 8124166 | MBOAT1   | 5.609929 | 5.224465 | 4.342823 | NM_001080480 |
| 8073662 | PARVB    | 5.632806 | 6.054708 | 6.962265 | NM_001003828 |
| 7985873 | TICRR    | 5.660335 | 5.780117 | 4.13255  | NM_001308025 |
| 8155754 | MAMDC2   | 5.670248 | 6.150896 | 7.149688 | NM_153267    |
| 7982102 | GABRA5   | 5.699346 | 6.632534 | 4.097627 | NM_000810    |
| 7987192 | SLC12A6  | 5.712003 | 6.071669 | 6.960524 | NM_001042494 |
| 7970513 | SKA3     | 5.765359 | 6.019273 | 4.47611  | NM_001166017 |
| 8076757 | CELSR1   | 5.787467 | 5.71789  | 4.588593 | NM_014246    |
| 7976795 | MEG3     | 5.797094 | 4.62799  | 8.763985 | NR_002766    |
| 7991034 | HOMER2   | 5.849521 | 5.078139 | 3.967296 | NM_004839    |
| 8066136 | RBL1     | 5.862245 | 6.185608 | 5.012794 | NM_002895    |
| 8122426 | PHACTR2  | 5.881479 | 6.045347 | 7.011969 | NM_001100164 |
| 8035465 | ISYNA1   | 5.902519 | 6.326935 | 7.378338 | NM_001170938 |
| 8174201 | BEX1     | 5.928147 | 6.508002 | 4.58607  | NM_018476    |
| 8127932 | TBX18    | 5.929869 | 6.054721 | 7.253736 | NM_001080508 |
| 8124413 | HIST1H4D | 5.933147 | 5.453468 | 4.469857 | NM_003539    |
| 8046895 | FAM171B  | 5.955008 | 5.998316 | 7.253956 | NM_177454    |

|         |            |          |          |          |              |
|---------|------------|----------|----------|----------|--------------|
| 8122724 | ULBP1      | 5.961882 | 5.959025 | 7.231815 | NM_025218    |
| 7912520 | NPPB       | 6.01553  | 6.068789 | 7.072328 | NM_002521    |
| 7986214 | SLCO3A1    | 6.047265 | 6.33946  | 3.611523 | NM_001145044 |
| 8043602 | NCAPH      | 6.080551 | 5.7222   | 4.645635 | NM_001281710 |
| 8065353 | THBD       | 6.083354 | 6.560971 | 8.489721 | NM_000361    |
| 8122099 | ENPP1      | 6.090173 | 5.905112 | 4.109865 | NM_006208    |
| 8094301 | SLIT2      | 6.135262 | 5.948711 | 5.038857 | NM_001289135 |
| 7897449 | SPSB1      | 6.137587 | 6.306324 | 7.571545 | NM_025106    |
| 7971461 | LCP1       | 6.146396 | 6.6564   | 4.214    | NM_002298    |
| 8046695 | ITGA4      | 6.150455 | 6.75944  | 7.62582  | NM_000885    |
| 8134098 | CDK14      | 6.160687 | 6.598107 | 7.430751 | NM_001287135 |
| 7901993 | CACHD1     | 6.18937  | 5.781844 | 4.523087 | NM_001293274 |
| 8069252 | PCBP3      | 6.198725 | 5.452059 | 4.406413 | NM_001130141 |
| 7944955 | PKNOX2     | 6.245763 | 6.03603  | 4.930992 | NM_022062    |
| 7962375 | PRICKLE1   | 6.278033 | 6.15418  | 4.402735 | NM_001144881 |
| 7929334 | CEP55      | 6.293085 | 6.581033 | 5.036497 | NM_001127182 |
| 8012883 | HS3ST3A1   | 6.298536 | 6.042541 | 4.932917 | NM_006042    |
| 8040223 | RRM2       | 6.300907 | 6.786909 | 5.11375  | NM_001034    |
| 8021946 | COLEC12    | 6.321092 | 5.90718  | 4.993235 | NM_130386    |
| 8014974 | TOP2A      | 6.327249 | 6.854273 | 4.822553 | NM_001067    |
| 7981964 | SNORD116-3 | 6.339323 | 6.179147 | 7.393049 | NR_003318    |
| 7901460 | GPX7       | 6.370981 | 6.580451 | 7.608717 | NM_015696    |
| 8122637 | SASH1      | 6.384047 | 7.24869  | 8.742763 | NM_015278    |
| 8022692 | DSC3       | 6.44559  | 6.065755 | 8.300377 | NM_001941    |
| 8108301 | KIF20A     | 6.50636  | 6.989044 | 5.540739 | NM_005733    |
| 8005449 | KRT17P2    | 6.506844 | 7.437622 | 4.950638 | AK296148     |
| 8156199 | DAPK1      | 6.583598 | 6.21024  | 4.459075 | NM_001288729 |
| 8124527 | HIST1H1B   | 6.618125 | 7.122617 | 5.781844 | NM_005322    |
| 7999754 | XYLT1      | 6.652751 | 6.496768 | 4.119151 | NM_022166    |
| 8094278 | NCAPG      | 6.672259 | 6.949751 | 5.391763 | NM_022346    |
| 8033818 | OLFM2      | 6.678961 | 7.120168 | 5.804385 | NM_001304347 |



|         |            |          |          |          |                 |
|---------|------------|----------|----------|----------|-----------------|
| 7902441 | ST6GALNAC5 | 6.686492 | 7.688751 | 5.639627 | NM_030965       |
| 7964602 | LRIG3      | 6.689498 | 5.855251 | 5.065257 | NM_001136051    |
| 8060897 | PLCB4      | 6.692489 | 6.958646 | 5.807831 | NM_000933       |
| 7982358 | ARHGAP11A  | 6.714486 | 6.679373 | 5.076457 | NM_001286479    |
| 8104022 | PDLIM3     | 6.723104 | 7.247554 | 8.323392 | NM_001114107    |
| 8166049 | PRPS2      | 6.723617 | 7.484012 | 5.661592 | NM_001039091    |
| 8075637 | LARGE      | 6.735202 | 6.120577 | 4.951985 | NM_004737       |
| 7899627 | TINAGL1    | 6.764538 | 7.867495 | 9.416409 | NM_001204414    |
| 8068671 | BACE2      | 6.770382 | 6.915091 | 5.451259 | NM_012105       |
| 7980908 | FBLN5      | 6.811926 | 6.405494 | 7.963328 | NM_006329       |
| 7909568 | DTL        | 6.814297 | 7.144142 | 5.125301 | NM_001286229    |
| 8124437 | HIST1H3F   | 6.837243 | 6.804944 | 5.524141 | NM_021018       |
| 8005097 | HS3ST3B1   | 6.848228 | 6.542455 | 4.308916 | NM_006041       |
| 8136248 | MEST       | 6.851563 | 7.921887 | 9.269516 | NM_001253900    |
| 8113726 | PPIC       | 6.88954  | 6.961374 | 7.931062 | NM_000943       |
| 8142981 | PODXL      | 6.915294 | 8.047222 | 9.431723 | NM_001018111    |
| 7938364 | WEE1       | 7.017804 | 6.910364 | 5.440882 | ENST00000524549 |
| 8071671 | GNAZ       | 7.019323 | 6.80997  | 5.117898 | NM_002073       |
| 8171297 | MID1       | 7.03113  | 6.817859 | 5.862845 | NM_000381       |
| 8172035 | DYNLT3     | 7.072733 | 6.993057 | 8.060137 | NM_006520       |
| 8086517 | CDCP1      | 7.109221 | 6.308784 | 5.001067 | NM_022842       |
| 7936494 | GFRA1      | 7.119196 | 7.759834 | 5.153673 | NM_001145453    |
| 7904158 | OLFML3     | 7.150547 | 6.427267 | 5.400223 | NM_001286352    |
| 8060813 | MCM8       | 7.167406 | 7.469702 | 6.213185 | NM_001281520    |
| 8098204 | CPE        | 7.180418 | 7.107944 | 5.306978 | NM_001873       |
| 8097098 | USP53      | 7.198789 | 7.094873 | 8.274392 | NM_019050       |
| 7990054 | UACA       | 7.211989 | 7.884422 | 8.728663 | NM_001008224    |
| 8131600 | TSPAN13    | 7.272326 | 8.111202 | 8.880699 | NM_014399       |
| 8153021 | ST3GAL1    | 7.311047 | 7.733921 | 5.902519 | NM_003033       |
| 8124388 | HIST1H3B   | 7.325696 | 7.368342 | 6.000334 | NM_003537       |
| 8046333 | CYBRD1     | 7.331817 | 8.274347 | 9.861664 | NM_001127383    |

|         |           |          |          |          |              |
|---------|-----------|----------|----------|----------|--------------|
| 8072687 | MCM5      | 7.348068 | 7.269277 | 6.160971 | NM_006739    |
| 8001784 | CDH8      | 7.349384 | 7.907311 | 5.138951 | NM_001796    |
| 7950307 | UCP2      | 7.360543 | 6.714551 | 5.876097 | NM_003355    |
| 8008784 | PRR11     | 7.372391 | 7.340515 | 6.009403 | NM_018304    |
| 8175871 | L1CAM     | 7.405349 | 6.392854 | 4.482969 | NM_000425    |
| 8030383 | RCN3      | 7.444001 | 8.160577 | 9.005676 | NM_020650    |
| 7951662 | CRYAB     | 7.492001 | 7.712568 | 9.261177 | NM_001289807 |
| 7901969 | ROR1      | 7.508128 | 7.837547 | 8.7986   | NM_001083592 |
| 8118890 | SCUBE3    | 7.556987 | 7.424299 | 9.089632 | NM_001303136 |
| 7932082 | CCDC3     | 7.611732 | 5.931174 | 4.199731 | NM_001282658 |
| 8138888 | PDE1C     | 7.619255 | 7.007731 | 5.71167  | NM_001191056 |
| 7956046 | DGKA      | 7.682218 | 8.047695 | 8.974467 | NM_001345    |
| 8001449 | IRX3      | 7.686186 | 6.763125 | 5.903809 | NM_024336    |
| 8116418 | GFPT2     | 7.722575 | 7.365243 | 6.056204 | NM_005110    |
| 7999468 | LITAF     | 7.774823 | 8.401083 | 5.481526 | NM_001136472 |
| 8108683 | PCDHB2    | 7.826665 | 7.642568 | 5.407521 | NM_018936    |
| 8015387 | KRT17     | 7.879084 | 8.692177 | 4.921796 | NM_000422    |
| 8115851 | STC2      | 7.938939 | 8.277897 | 9.19849  | NM_003714    |
| 8059854 | ARL4C     | 8.012944 | 7.043461 | 6.047235 | NM_001282431 |
| 8161701 | TMEM2     | 8.033732 | 7.542506 | 6.329821 | NM_001135820 |
| 7990345 | SEMA7A    | 8.048428 | 7.646872 | 6.653291 | NM_001146029 |
| 8054439 | ST6GAL2   | 8.056755 | 7.422904 | 6.671877 | NM_001142351 |
| 7930980 | PLPP4     | 8.117237 | 6.940271 | 5.186088 | NM_001030059 |
| 7948229 | SLC43A3   | 8.155936 | 7.825219 | 5.539972 | NM_001278201 |
| 8013042 | KRT17P2   | 8.177467 | 9.178667 | 7.110447 | AK296148     |
| 8117426 | HIST1H2BH | 8.182202 | 8.207098 | 6.600335 | NM_003524    |
| 7960919 | MFAP5     | 8.197567 | 8.670865 | 10.45437 | NM_001297709 |
| 8001197 | NETO2     | 8.232244 | 7.581448 | 6.031626 | NM_001201477 |
| 8059905 | COL6A3    | 8.280857 | 9.34433  | 7.145096 | NM_004369    |
| 8170119 | FHL1      | 8.357913 | 9.238449 | 10.05693 | NM_001159699 |
| 8006433 | CCL2      | 8.3782   | 9.556733 | 6.362932 | NM_002982    |

|         |          |          |          |          |                    |
|---------|----------|----------|----------|----------|--------------------|
| 7928589 | PPIF     | 8.491174 | 8.482619 | 7.346016 | NM_005729          |
| 7984540 | KIF23    | 8.538855 | 8.299293 | 7.300292 | NM_001281301       |
| 7997642 | CRISPLD2 | 8.578808 | 7.69061  | 3.878607 | NM_031476          |
| 8117368 | HIST1H4C | 8.675164 | 9.000552 | 7.755011 | NM_003542          |
| 8109752 | TENM2    | 8.681618 | 8.2613   | 5.533885 | NM_001080428       |
| 7955637 | KRT18    | 9.106567 | 9.797234 | 10.46973 | NM_000224          |
| 7952268 | THY1     | 9.24589  | 9.657022 | 7.613053 | NM_001311160       |
| 8169240 | PRPS1    | 9.43181  | 9.541888 | 7.767011 | NM_001204402       |
| 8104461 | ---      | 4.412413 | 3.94606  | 5.30721  | NONHSAT100420      |
| 7998927 | ---      | 4.714522 | 5.183132 | 3.620875 | uc021tbe.1         |
| 7930380 | ADD3     | 5.126945 | 6.023119 | 7.075558 | NM_001121          |
| 8034783 | ADGRL1   | 5.232126 | 5.685818 | 6.480236 | NM_001008701       |
| 8158771 | AIF1L    | 5.47957  | 5.280882 | 3.963605 | NM_001185095       |
| 7902565 | ADGRL2   | 5.62748  | 5.822192 | 7.070981 | NM_001297704       |
| 8040362 | ---      | 5.632806 | 5.658631 | 6.66814  | GENSCAN00000010282 |
| 8037387 | ---      | 5.638609 | 6.119893 | 4.730884 | NONHSAT066617      |
| 7981317 | ---      | 5.715791 | 5.478179 | 8.456131 | NONHSAT039752      |
| 8050766 | ADCY3    | 5.776019 | 6.164147 | 4.92509  | NM_004036          |
| 8154491 | ADAMTSL1 | 5.802879 | 6.186495 | 4.232107 | NM_001040272       |
| 7981514 | AHNAK2   | 5.991465 | 5.931174 | 6.994463 | NM_138420          |
| 8112327 | ---      | 6.559037 | 6.855026 | 5.681139 | ENST00000497342    |
| 7985786 | ACAN     | 6.699649 | 6.164265 | 4.538263 | NM_001135          |
| 8171248 | ANOS1    | 7.662767 | 8.269506 | 9.28553  | NM_000216          |
| 7896752 | ---      | 8.069938 | 8.450727 | 4.518978 | ENST00000387421    |
| 8165667 | ---      | 8.069938 | 8.450727 | 4.518978 | ENST00000387421    |
| 8043375 | ---      | 8.316909 | 8.62455  | 4.255461 | ENST00000387421    |
| 8132318 | ANLN     | 8.681654 | 8.558188 | 7.171162 | NM_001284301       |

**Table S2. RNA-Seq gene expression in Whole Mouse Lung**

| ensembl_gene_id   | mgi_symbol | Description                                                                                                                        | Control | Control | KCNK3 <sup>n/n</sup> | KCNK3 <sup>n/n</sup> | Fold Change |
|-------------------|------------|------------------------------------------------------------------------------------------------------------------------------------|---------|---------|----------------------|----------------------|-------------|
| ENSMUSG0000018381 | Abi3       | ABI gene family, member 3 [Source:MGI Symbol;Acc:MGI:1913860]                                                                      | 11.2    | 11.2    | 11.5                 | 11.6                 | 1.3         |
| ENSMUSG0000044337 | Ackr3      | atypical chemokine receptor 3 [Source:MGI Symbol;Acc:MGI:109562]                                                                   | 12.3    | 12.2    | 11.8                 | 11.7                 | -1.4        |
| ENSMUSG0000017307 | Acot8      | acyl-CoA thioesterase 8 [Source:MGI Symbol;Acc:MGI:2158201]                                                                        | 8.9     | 9.0     | 9.3                  | 9.2                  | 1.3         |
| ENSMUSG0000058145 | Adamts17   | a disintegrin-like and metallopeptidase (reprolysin type) with thrombospondin type 1 motif, 17 [Source:MGI Symbol;Acc:MGI:3588195] | 8.8     | 8.8     | 9.2                  | 9.2                  | 1.3         |
| ENSMUSG0000031448 | Adprhl1    | ADP-ribosylhydrolase like 1 [Source:MGI Symbol;Acc:MGI:2442168]                                                                    | 5.2     | 5.4     | 6.3                  | 6.2                  | 2.0         |
| ENSMUSG0000058620 | Adra2b     | adrenergic receptor, alpha 2b [Source:MGI Symbol;Acc:MGI:87935]                                                                    | 5.3     | 5.2     | 4.7                  | 4.6                  | -1.5        |
| ENSMUSG0000010601 | Apol7a     | apolipoprotein L 7a [Source:MGI Symbol;Acc:MGI:1923011]                                                                            | 5.3     | 5.4     | 6.0                  | 5.9                  | 1.5         |
| ENSMUSG0000028919 | Arhgef19   | Rho guanine nucleotide exchange factor (GEF) 19 [Source:MGI Symbol;Acc:MGI:1925912]                                                | 9.6     | 9.6     | 9.9                  | 10.0                 | 1.3         |
| ENSMUSG0000047446 | Arl4a      | ADP-ribosylation factor-like 4A [Source:MGI Symbol;Acc:MGI:99437]                                                                  | 11.4    | 11.3    | 11.0                 | 10.9                 | -1.3        |
| ENSMUSG0000037053 | Azgp1      | alpha-2-glycoprotein 1, zinc [Source:MGI Symbol;Acc:MGI:103163]                                                                    | 7.7     | 7.7     | 8.2                  | 8.1                  | 1.3         |
| ENSMUSG0000021070 | Bdkrb2     | bradykinin receptor, beta 2 [Source:MGI Symbol;Acc:MGI:102845]                                                                     | 7.9     | 7.9     | 7.4                  | 7.6                  | -1.4        |
| ENSMUSG0000038871 | Bpgm       | 2,3-bisphosphoglycerate mutase [Source:MGI Symbol;Acc:MGI:1098242]                                                                 | 11.1    | 11.3    | 10.7                 | 10.7                 | -1.5        |
| ENSMUSG0000063130 | Calml3     | calmodulin-like 3 [Source:MGI Symbol;Acc:MGI:1917655]                                                                              | 7.4     | 7.3     | 6.9                  | 7.1                  | -1.3        |
| ENSMUSG0000031883 | Car7       | carbonic anhydrase 7 [Source:MGI Symbol;Acc:MGI:103100]                                                                            | 6.4     | 6.5     | 6.0                  | 6.0                  | -1.3        |
| ENSMUSG0000031143 | Ccdc22     | coiled-coil domain containing 22 [Source:MGI Symbol;Acc:MGI:1859608]                                                               | 4.2     | 3.9     | 5.0                  | 5.3                  | 2.1         |
| ENSMUSG0000042262 | Ccr8       | chemokine (C-C motif) receptor 8 [Source:MGI Symbol;Acc:MGI:1201402]                                                               | 5.9     | 6.0     | 5.4                  | 5.5                  | -1.4        |

|                   |               |                                                                                           |      |      |      |      |      |
|-------------------|---------------|-------------------------------------------------------------------------------------------|------|------|------|------|------|
| ENSMUSG0000069607 | Cd300lh       | CD300 antigen like family member H [Source:MGI Symbol;Acc:MGI:2687214]                    | 3.6  | 3.6  | 4.3  | 4.3  | 1.6  |
| ENSMUSG0000030798 | Cd37          | CD37 antigen [Source:MGI Symbol;Acc:MGI:88330]                                            | 7.0  | 6.9  | 6.5  | 6.6  | -1.4 |
| ENSMUSG0000027435 | Cd93          | CD93 antigen [Source:MGI Symbol;Acc:MGI:106664]                                           | 15.1 | 15.1 | 15.5 | 15.4 | 1.3  |
| ENSMUSG0000021175 | Cdca7l        | cell division cycle associated 7 like [Source:MGI Symbol;Acc:MGI:2384982]                 | 8.5  | 8.4  | 8.1  | 8.0  | -1.3 |
| ENSMUSG0000000305 | Cdh4          | cadherin 4 [Source:MGI Symbol;Acc:MGI:99218]                                              | 9.8  | 9.8  | 9.3  | 9.3  | -1.4 |
| ENSMUSG0000002835 | Chaf1a        | chromatin assembly factor 1, subunit A (p150) [Source:MGI Symbol;Acc:MGI:1351331]         | 9.3  | 9.2  | 8.7  | 8.8  | -1.4 |
| ENSMUSG0000022945 | Chaf1b        | chromatin assembly factor 1, subunit B (p60) [Source:MGI Symbol;Acc:MGI:1314881]          | 8.2  | 8.1  | 7.8  | 7.8  | -1.3 |
| ENSMUSG0000030365 | Clec2i        | C-type lectin domain family 2, member i [Source:MGI Symbol;Acc:MGI:2136650]               | 7.4  | 7.4  | 7.0  | 7.1  | -1.3 |
| ENSMUSG0000025064 | Col17a1       | collagen, type XVII, alpha 1 [Source:MGI Symbol;Acc:MGI:88450]                            | 8.5  | 8.5  | 8.9  | 8.8  | 1.3  |
| ENSMUSG0000018916 | Csf2          | colony stimulating factor 2 (granulocyte-macrophage) [Source:MGI Symbol;Acc:MGI:1339752]  | 6.5  | 6.6  | 7.2  | 7.2  | 1.6  |
| ENSMUSG0000052336 | Cx3cr1        | chemokine (C-X3-C motif) receptor 1 [Source:MGI Symbol;Acc:MGI:1333815]                   | 9.8  | 9.8  | 10.3 | 10.3 | 1.4  |
| ENSMUSG0000027983 | Cyp2u1        | cytochrome P450, family 2, subfamily u, polypeptide 1 [Source:MGI Symbol;Acc:MGI:1918769] | 7.3  | 7.3  | 7.7  | 7.6  | 1.3  |
| ENSMUSG0000047642 | D930020B18Rik | RIKEN cDNA D930020B18 gene [Source:MGI Symbol;Acc:MGI:2442001]                            | 6.4  | 6.3  | 7.1  | 6.9  | 1.6  |
| ENSMUSG0000036862 | Dchs1         | dachsous 1 (Drosophila) [Source:MGI Symbol;Acc:MGI:2685011]                               | 11.4 | 11.5 | 11.8 | 11.8 | 1.3  |
| ENSMUSG0000043051 | Disc1         | disrupted in schizophrenia 1 [Source:MGI Symbol;Acc:MGI:2447658]                          | 7.2  | 7.1  | 7.7  | 7.5  | 1.3  |
| ENSMUSG0000047517 | Dmbt1         | deleted in malignant brain tumors 1 [Source:MGI Symbol;Acc:MGI:106210]                    | 3.1  | 3.0  | 3.7  | 3.7  | 1.6  |
| ENSMUSG0000036766 | Dner          | delta/notch-like EGF repeat containing [Source:MGI Symbol;Acc:MGI:2152889]                | 6.3  | 6.4  | 6.0  | 5.9  | -1.3 |
| ENSMUSG0000040631 | Dok4          | docking protein 4 [Source:MGI Symbol;Acc:MGI:2148865]                                     | 11.0 | 11.0 | 11.3 | 11.4 | 1.3  |



|                   |               |                                                                                             |      |      |      |      |      |
|-------------------|---------------|---------------------------------------------------------------------------------------------|------|------|------|------|------|
| ENSMUSG0000078580 | E430018J23Rik | RIKEN cDNA E430018J23 gene [Source:MGI Symbol;Acc:MGI:2141981]                              | 8.7  | 8.7  | 9.2  | 9.0  | 1.3  |
| ENSMUSG0000010476 | Ebf3          | early B cell factor 3 [Source:MGI Symbol;Acc:MGI:894289]                                    | 5.0  | 5.1  | 4.4  | 4.5  | -1.5 |
| ENSMUSG0000022122 | Ednrb         | endothelin receptor type B [Source:MGI Symbol;Acc:MGI:102720]                               | 11.6 | 11.5 | 11.8 | 12.0 | 1.3  |
| ENSMUSG0000022203 | Efs           | embryonal Fyn-associated substrate [Source:MGI Symbol;Acc:MGI:105311]                       | 8.8  | 8.8  | 9.2  | 9.4  | 1.4  |
| ENSMUSG0000019989 | Enpp3         | ectonucleotide pyrophosphatase/phosphodiesterase 3 [Source:MGI Symbol;Acc:MGI:2143702]      | 7.5  | 7.3  | 7.0  | 7.0  | -1.3 |
| ENSMUSG0000028644 | Ermap         | erythroblast membrane-associated protein [Source:MGI Symbol;Acc:MGI:1349816]                | 5.8  | 6.2  | 4.9  | 5.0  | -2.1 |
| ENSMUSG0000019768 | Esr1          | estrogen receptor 1 (alpha) [Source:MGI Symbol;Acc:MGI:1352467]                             | 7.7  | 7.6  | 8.9  | 8.9  | 2.3  |
| ENSMUSG0000019909 | Fam162b       | family with sequence similarity 162, member B [Source:MGI Symbol;Acc:MGI:1924546]           | 6.9  | 7.2  | 7.9  | 8.0  | 1.8  |
| ENSMUSG0000042788 | Fam166b       | family with sequence similarity 166, member B [Source:MGI Symbol;Acc:MGI:2445194]           | 7.6  | 7.5  | 7.9  | 7.9  | 1.3  |
| ENSMUSG0000050493 | Fam167b       | family with sequence similarity 167, member B [Source:MGI Symbol;Acc:MGI:2668032]           | 6.4  | 6.3  | 6.0  | 5.9  | -1.3 |
| ENSMUSG0000073805 | Fam196a       | family with sequence similarity 196, member A [Source:MGI Symbol;Acc:MGI:3605068]           | 7.0  | 7.0  | 6.3  | 6.2  | -1.7 |
| ENSMUSG0000034532 | Fbxo16        | F-box protein 16 [Source:MGI Symbol;Acc:MGI:1354706]                                        | 6.1  | 6.0  | 6.7  | 6.5  | 1.5  |
| ENSMUSG0000089984 | Fbxo24        | F-box protein 24 [Source:MGI Symbol;Acc:MGI:1918426]                                        | 5.8  | 5.7  | 5.3  | 5.3  | -1.4 |
| ENSMUSG0000090173 | Fbxw10        | F-box and WD-40 domain protein 10 [Source:MGI Symbol;Acc:MGI:3052463]                       | 6.4  | 6.3  | 5.6  | 5.6  | -1.7 |
| ENSMUSG0000037106 | Fer1l6        | fer-1-like 6 (C. elegans) [Source:MGI Symbol;Acc:MGI:3645398]                               | 6.4  | 6.4  | 5.4  | 5.4  | -1.9 |
| ENSMUSG0000044453 | Ffar1         | free fatty acid receptor 1 [Source:MGI Symbol;Acc:MGI:2684079]                              | 6.3  | 6.4  | 5.6  | 5.6  | -1.7 |
| ENSMUSG0000047787 | Flrt1         | fibronectin leucine rich transmembrane protein 1 [Source:MGI Symbol;Acc:MGI:3026647]        | 6.0  | 5.9  | 5.6  | 5.6  | -1.3 |
| ENSMUSG0000029212 | Gabrb1        | gamma-aminobutyric acid (GABA) A receptor, subunit beta 1 [Source:MGI Symbol;Acc:MGI:95619] | 5.5  | 5.7  | 6.2  | 6.1  | 1.4  |

|                   |          |                                                                                                 |      |      |      |      |      |
|-------------------|----------|-------------------------------------------------------------------------------------------------|------|------|------|------|------|
| ENSMUSG0000028671 | Gale     | galactose-4-epimerase, UDP [Source:MGI Symbol;Acc:MGI:1921496]                                  | 8.8  | 8.8  | 9.2  | 9.1  | 1.3  |
| ENSMUSG0000015944 | Gatsl2   | GATS protein-like 2 [Source:MGI Symbol;Acc:MGI:1933384]                                         | 11.4 | 11.5 | 11.8 | 11.8 | 1.3  |
| ENSMUSG0000038508 | Gdf15    | growth differentiation factor 15 [Source:MGI Symbol;Acc:MGI:1346047]                            | 6.9  | 6.9  | 7.4  | 7.3  | 1.4  |
| ENSMUSG0000061104 | Gm10094  | predicted gene 10094 [Source:MGI Symbol;Acc:MGI:3704317]                                        | 6.2  | 6.1  | 5.8  | 5.7  | -1.3 |
| ENSMUSG0000091556 | Gm14569  | predicted gene 14569 [Source:MGI Symbol;Acc:MGI:3705243]                                        | 6.0  | 5.9  | 6.4  | 6.5  | 1.5  |
| ENSMUSG0000031748 | Gnao1    | guanine nucleotide binding protein, alpha O [Source:MGI Symbol;Acc:MGI:95775]                   | 10.3 | 10.2 | 10.7 | 10.9 | 1.4  |
| ENSMUSG0000015812 | Gnrh1    | gonadotropin releasing hormone 1 [Source:MGI Symbol;Acc:MGI:95789]                              | 6.1  | 5.7  | 5.1  | 5.2  | -1.7 |
| ENSMUSG0000039720 | Got1l1   | glutamic-oxaloacetic transaminase 1-like 1 [Source:MGI Symbol;Acc:MGI:1923865]                  | 4.6  | 4.7  | 5.4  | 5.3  | 1.6  |
| ENSMUSG0000031700 | Gpt2     | glutamic pyruvate transaminase (alanine aminotransferase) 2 [Source:MGI Symbol;Acc:MGI:1915391] | 9.3  | 9.4  | 9.8  | 9.7  | 1.3  |
| ENSMUSG0000046182 | Gsg1l    | GSG1-like [Source:MGI Symbol;Acc:MGI:2685483]                                                   | 8.2  | 8.1  | 7.5  | 7.6  | -1.5 |
| ENSMUSG0000023982 | Guca1a   | guanylate cyclase activator 1a (retina) [Source:MGI Symbol;Acc:MGI:102770]                      | 5.6  | 6.1  | 4.6  | 4.7  | -2.4 |
| ENSMUSG0000051839 | Gypa     | glycophorin A [Source:MGI Symbol;Acc:MGI:95880]                                                 | 6.9  | 7.4  | 4.5  | 3.7  | -8.3 |
| ENSMUSG0000038422 | Hdhd3    | haloacid dehalogenase-like hydrolase domain containing 3 [Source:MGI Symbol;Acc:MGI:1919998]    | 7.4  | 7.5  | 7.8  | 7.9  | 1.3  |
| ENSMUSG0000041180 | Hectd2   | HECT domain containing 2 [Source:MGI Symbol;Acc:MGI:2442663]                                    | 8.2  | 8.3  | 8.0  | 7.8  | -1.3 |
| ENSMUSG0000043342 | Hoxd9    | homeobox D9 [Source:MGI Symbol;Acc:MGI:96210]                                                   | 6.5  | 6.2  | 5.3  | 5.5  | -1.9 |
| ENSMUSG0000029096 | Htra3    | HtrA serine peptidase 3 [Source:MGI Symbol;Acc:MGI:1925808]                                     | 10.2 | 10.2 | 10.6 | 10.8 | 1.4  |
| ENSMUSG0000079017 | Ifi2712a | interferon, alpha-inducible protein 27 like 2A [Source:MGI Symbol;Acc:MGI:1924183]              | 9.4  | 9.5  | 10.0 | 10.0 | 1.4  |
| ENSMUSG0000031111 | Igsf1    | immunoglobulin superfamily, member 1 [Source:MGI Symbol;Acc:MGI:2147913]                        | 4.7  | 4.7  | 5.4  | 5.3  | 1.6  |

|                   |         |                                                                                                                    |      |      |      |      |      |
|-------------------|---------|--------------------------------------------------------------------------------------------------------------------|------|------|------|------|------|
| ENSMUSG0000049093 | Il23r   | interleukin 23 receptor [Source:MGI Symbol;Acc:MGI:2181693]                                                        | 5.6  | 5.6  | 4.8  | 5.0  | -1.6 |
| ENSMUSG0000068227 | Il2rb   | interleukin 2 receptor, beta chain [Source:MGI Symbol;Acc:MGI:96550]                                               | 9.9  | 9.8  | 9.4  | 9.3  | -1.4 |
| ENSMUSG0000037801 | Iqch    | IQ motif containing H [Source:MGI Symbol;Acc:MGI:1925500]                                                          | 4.6  | 4.4  | 5.5  | 5.1  | 1.8  |
| ENSMUSG0000018470 | Kcnab3  | potassium voltage-gated channel, shaker-related subfamily, beta member 3 [Source:MGI Symbol;Acc:MGI:1336208]       | 6.7  | 6.6  | 5.9  | 5.5  | -1.9 |
| ENSMUSG0000025597 | Klh14   | kelch-like 4 [Source:MGI Symbol;Acc:MGI:2442829]                                                                   | 8.2  | 8.2  | 7.8  | 7.6  | -1.4 |
| ENSMUSG0000030167 | Klrc1   | killer cell lectin-like receptor subfamily C, member 1 [Source:MGI Symbol;Acc:MGI:1336161]                         | 6.1  | 6.1  | 5.6  | 5.6  | -1.4 |
| ENSMUSG0000100916 | Lhb     | luteinizing hormone beta [Source:MGI Symbol;Acc:MGI:96782]                                                         | 7.1  | 6.9  | 7.6  | 7.5  | 1.5  |
| ENSMUSG0000030427 | Lilra6  | leukocyte immunoglobulin-like receptor, subfamily A (with TM domain), member 6 [Source:MGI Symbol;Acc:MGI:1195969] | 7.9  | 7.7  | 8.2  | 8.3  | 1.4  |
| ENSMUSG0000022595 | Lypd2   | Ly6/Plaur domain containing 2 [Source:MGI Symbol;Acc:MGI:1915561]                                                  | 8.9  | 8.7  | 9.2  | 9.2  | 1.3  |
| ENSMUSG0000025963 | Mdh1b   | malate dehydrogenase 1B, NAD (soluble) [Source:MGI Symbol;Acc:MGI:1923918]                                         | 7.1  | 7.1  | 7.5  | 7.5  | 1.3  |
| ENSMUSG0000051855 | Mest    | mesoderm specific transcript [Source:MGI Symbol;Acc:MGI:96968]                                                     | 9.2  | 9.2  | 8.8  | 8.7  | -1.3 |
| ENSMUSG0000054641 | Mmrn1   | multimerin 1 [Source:MGI Symbol;Acc:MGI:1918195]                                                                   | 12.7 | 12.6 | 12.2 | 12.3 | -1.3 |
| ENSMUSG0000079429 | Mroh2a  | maestro heat-like repeat family member 2A [Source:MGI Symbol;Acc:MGI:3705228]                                      | 5.9  | 5.8  | 5.4  | 5.4  | -1.3 |
| ENSMUSG0000025141 | Myadml2 | myeloid-associated differentiation marker-like 2 [Source:MGI Symbol;Acc:MGI:1915765]                               | 3.3  | 3.0  | 4.9  | 4.9  | 3.4  |
| ENSMUSG0000022346 | Myc     | myelocytomatosis oncogene [Source:MGI Symbol;Acc:MGI:97250]                                                        | 9.5  | 9.4  | 8.9  | 8.8  | -1.5 |
| ENSMUSG0000041361 | Myzap   | myocardial zonula adherens protein [Source:MGI Symbol;Acc:MGI:2142908]                                             | 10.7 | 10.7 | 11.2 | 11.2 | 1.4  |
| ENSMUSG0000030380 | Mzfl    | myeloid zinc finger 1 [Source:MGI Symbol;Acc:MGI:107457]                                                           | 6.3  | 6.3  | 6.8  | 6.7  | 1.4  |

|                   |           |                                                                                               |      |      |      |      |      |
|-------------------|-----------|-----------------------------------------------------------------------------------------------|------|------|------|------|------|
| ENSMUSG0000006471 | Ndor1     | NADPH dependent diflavin oxidoreductase 1 [Source:MGI Symbol;Acc:MGI:1926047]                 | 11.1 | 11.0 | 10.5 | 10.5 | -1.5 |
| ENSMUSG0000031478 | Nek3      | NIMA (never in mitosis gene a)-related expressed kinase 3 [Source:MGI Symbol;Acc:MGI:1344371] | 7.5  | 7.4  | 7.8  | 7.9  | 1.3  |
| ENSMUSG0000029832 | Nfe2l3    | nuclear factor, erythroid derived 2, like 3 [Source:MGI Symbol;Acc:MGI:1339958]               | 7.6  | 7.6  | 7.3  | 7.2  | -1.3 |
| ENSMUSG0000015468 | Notch4    | notch 4 [Source:MGI Symbol;Acc:MGI:107471]                                                    | 13.2 | 13.4 | 13.7 | 13.8 | 1.4  |
| ENSMUSG0000059791 | Nrm       | nurim (nuclear envelope membrane protein) [Source:MGI Symbol;Acc:MGI:2146855]                 | 9.0  | 8.9  | 8.6  | 8.6  | -1.3 |
| ENSMUSG0000020297 | Nsg2      | neuron specific gene family member 2 [Source:MGI Symbol;Acc:MGI:1202070]                      | 7.3  | 7.2  | 7.0  | 6.9  | -1.3 |
| ENSMUSG0000045392 | Olfir1033 | olfactory receptor 1033 [Source:MGI Symbol;Acc:MGI:3030867]                                   | 6.2  | 6.4  | 6.8  | 6.8  | 1.4  |
| ENSMUSG0000037366 | Pafah2    | platelet-activating factor acetylhydrolase 2 [Source:MGI Symbol;Acc:MGI:2140321]              | 10.4 | 10.3 | 10.7 | 10.7 | 1.3  |
| ENSMUSG0000030513 | Pcsk6     | proprotein convertase subtilisin/kexin type 6 [Source:MGI Symbol;Acc:MGI:102897]              | 10.6 | 10.6 | 10.3 | 10.1 | -1.3 |
| ENSMUSG0000035246 | Pcyt1b    | phosphate cytidyltransferase 1, choline, beta isoform [Source:MGI Symbol;Acc:MGI:2147987]     | 7.7  | 7.7  | 7.3  | 7.4  | -1.3 |
| ENSMUSG0000050751 | Pgbd5     | piggyBac transposable element derived 5 [Source:MGI Symbol;Acc:MGI:2429955]                   | 5.1  | 5.1  | 4.6  | 4.6  | -1.4 |
| ENSMUSG0000041202 | Pla2g2d   | phospholipase A2, group IID [Source:MGI Symbol;Acc:MGI:1341796]                               | 6.6  | 6.7  | 6.2  | 6.3  | -1.3 |
| ENSMUSG0000026173 | Plcd4     | phospholipase C, delta 4 [Source:MGI Symbol;Acc:MGI:107469]                                   | 6.1  | 6.3  | 6.8  | 6.7  | 1.5  |
| ENSMUSG0000044667 | Plppr4    | phospholipid phosphatase related 4 [Source:MGI Symbol;Acc:MGI:106530]                         | 4.7  | 4.7  | 5.2  | 5.3  | 1.4  |
| ENSMUSG0000070802 | Pnmal2    | PNMA-like 2 [Source:MGI Symbol;Acc:MGI:3645856]                                               | 8.9  | 9.0  | 9.2  | 9.3  | 1.3  |
| ENSMUSG0000020974 | Pole2     | polymerase (DNA directed), epsilon 2 (p59 subunit) [Source:MGI Symbol;Acc:MGI:1197514]        | 7.5  | 7.4  | 7.0  | 7.1  | -1.4 |
| ENSMUSG0000061718 | Ppp1r1b   | protein phosphatase 1, regulatory (inhibitor) subunit 1B [Source:MGI Symbol;Acc:MGI:94860]    | 9.2  | 9.3  | 9.8  | 9.8  | 1.4  |
| ENSMUSG0000038151 | Prdm1     | PR domain containing 1, with ZNF domain [Source:MGI Symbol;Acc:MGI:99655]                     | 9.6  | 9.5  | 9.8  | 9.9  | 1.3  |

|                   |         |                                                                                              |      |      |      |      |      |
|-------------------|---------|----------------------------------------------------------------------------------------------|------|------|------|------|------|
| ENSMUSG0000010175 | Prox1   | prospero homeobox 1 [Source:MGI Symbol;Acc:MGI:97772]                                        | 10.3 | 10.3 | 9.9  | 10.0 | -1.3 |
| ENSMUSG0000053198 | Prx     | periaxin [Source:MGI Symbol;Acc:MGI:108176]                                                  | 14.2 | 14.2 | 14.5 | 14.6 | 1.3  |
| ENSMUSG0000097487 | Ptges3l | prostaglandin E synthase 3 (cytosolic)-like [Source:MGI Symbol;Acc:MGI:1916146]              | 5.2  | 5.3  | 5.5  | 5.6  | 1.3  |
| ENSMUSG0000038751 | Ptk6    | PTK6 protein tyrosine kinase 6 [Source:MGI Symbol;Acc:MGI:99683]                             | 5.8  | 6.0  | 6.9  | 6.8  | 1.9  |
| ENSMUSG0000026204 | Ptpn    | protein tyrosine phosphatase, receptor type, N [Source:MGI Symbol;Acc:MGI:102765]            | 8.1  | 8.1  | 7.7  | 7.8  | -1.3 |
| ENSMUSG0000066677 | Pydc3   | pyrin domain containing 3 [Source:MGI Symbol;Acc:MGI:2442822]                                | 10.0 | 9.9  | 10.3 | 10.5 | 1.3  |
| ENSMUSG0000030359 | Pzp     | pregnancy zone protein [Source:MGI Symbol;Acc:MGI:87854]                                     | 4.9  | 4.9  | 5.4  | 5.4  | 1.4  |
| ENSMUSG0000003411 | Rab3b   | RAB3B, member RAS oncogene family [Source:MGI Symbol;Acc:MGI:1917158]                        | 4.4  | 4.3  | 5.2  | 5.3  | 1.8  |
| ENSMUSG0000029602 | Rasal1  | RAS protein activator like 1 (GAP1 like) [Source:MGI Symbol;Acc:MGI:1330842]                 | 4.7  | 4.7  | 4.0  | 3.9  | -1.7 |
| ENSMUSG0000025576 | Rbfox3  | RNA binding protein, fox-1 homolog (C. elegans) 3 [Source:MGI Symbol;Acc:MGI:106368]         | 6.3  | 6.4  | 6.8  | 6.9  | 1.4  |
| ENSMUSG0000029136 | Rbks    | ribokinase [Source:MGI Symbol;Acc:MGI:1918586]                                               | 7.0  | 6.8  | 7.4  | 7.6  | 1.5  |
| ENSMUSG0000032454 | Rbp2    | retinol binding protein 2, cellular [Source:MGI Symbol;Acc:MGI:97877]                        | 4.1  | 4.0  | 5.3  | 5.4  | 2.4  |
| ENSMUSG0000048899 | Rimkla  | ribosomal modification protein rimK-like family member A [Source:MGI Symbol;Acc:MGI:3040686] | 4.9  | 5.0  | 4.4  | 4.6  | -1.4 |
| ENSMUSG0000046215 | Rprml   | reprimin-like [Source:MGI Symbol;Acc:MGI:2144486]                                            | 6.2  | 6.2  | 7.0  | 7.3  | 1.9  |
| ENSMUSG0000074115 | Saa1    | serum amyloid A 1 [Source:MGI Symbol;Acc:MGI:98221]                                          | 2.9  | 2.4  | 5.0  | 5.5  | 6.2  |
| ENSMUSG0000031665 | Sall1   | sal-like 1 (Drosophila) [Source:MGI Symbol;Acc:MGI:1889585]                                  | 4.2  | 4.4  | 5.3  | 5.8  | 2.4  |
| ENSMUSG0000070304 | Scn2b   | sodium channel, voltage-gated, type II, beta [Source:MGI Symbol;Acc:MGI:106921]              | 6.3  | 6.2  | 5.9  | 5.7  | -1.4 |
| ENSMUSG0000005696 | Sh2d1a  | SH2 domain containing 1A [Source:MGI Symbol;Acc:MGI:1328352]                                 | 3.6  | 3.8  | 5.4  | 4.9  | 2.8  |



|                   |          |                                                                                                               |      |      |      |      |      |
|-------------------|----------|---------------------------------------------------------------------------------------------------------------|------|------|------|------|------|
| ENSMUSG0000051504 | Siglech  | sialic acid binding Ig-like lectin H [Source:MGI Symbol;Acc:MGI:2443256]                                      | 6.9  | 6.8  | 7.3  | 7.5  | 1.4  |
| ENSMUSG0000070280 | Slc22a14 | solute carrier family 22 (organic cation transporter), member 14 [Source:MGI Symbol;Acc:MGI:2685974]          | 4.7  | 4.6  | 5.1  | 5.2  | 1.4  |
| ENSMUSG0000029175 | Slc35f6  | solute carrier family 35, member F6 [Source:MGI Symbol;Acc:MGI:1922169]                                       | 11.3 | 11.3 | 11.7 | 11.7 | 1.3  |
| ENSMUSG0000006574 | Slc4a1   | solute carrier family 4 (anion exchanger), member 1 [Source:MGI Symbol;Acc:MGI:109393]                        | 9.3  | 10.1 | 7.1  | 6.3  | -7.8 |
| ENSMUSG0000041644 | Slc5a12  | solute carrier family 5 (sodium/glucose cotransporter), member 12 [Source:MGI Symbol;Acc:MGI:2138890]         | 5.0  | 5.6  | 6.8  | 6.7  | 2.8  |
| ENSMUSG0000025938 | Slco5a1  | solute carrier organic anion transporter family, member 5A1 [Source:MGI Symbol;Acc:MGI:2443431]               | 8.5  | 8.5  | 8.1  | 8.2  | -1.3 |
| ENSMUSG0000036867 | Smad6    | SMAD family member 6 [Source:MGI Symbol;Acc:MGI:1336883]                                                      | 12.6 | 12.6 | 13.0 | 13.1 | 1.3  |
| ENSMUSG0000025889 | Snca     | synuclein, alpha [Source:MGI Symbol;Acc:MGI:1277151]                                                          | 8.7  | 9.3  | 7.6  | 7.4  | -2.8 |
| ENSMUSG0000026532 | Spta1    | spectrin alpha, erythrocytic 1 [Source:MGI Symbol;Acc:MGI:98385]                                              | 6.6  | 7.1  | 5.6  | 5.5  | -2.5 |
| ENSMUSG0000017400 | Stac2    | SH3 and cysteine rich domain 2 [Source:MGI Symbol;Acc:MGI:2144518]                                            | 7.1  | 7.2  | 6.2  | 6.3  | -1.8 |
| ENSMUSG0000031027 | Stk33    | serine/threonine kinase 33 [Source:MGI Symbol;Acc:MGI:2152419]                                                | 9.0  | 9.0  | 9.4  | 9.4  | 1.3  |
| ENSMUSG0000041479 | Syt15    | synaptotagmin XV [Source:MGI Symbol;Acc:MGI:2442166]                                                          | 8.4  | 8.2  | 8.9  | 9.1  | 1.7  |
| ENSMUSG0000001983 | Taco1    | translational activator of mitochondrially encoded cytochrome c oxidase I [Source:MGI Symbol;Acc:MGI:1917457] | 9.1  | 8.9  | 8.6  | 8.6  | -1.3 |
| ENSMUSG0000002781 | Tmem143  | transmembrane protein 143 [Source:MGI Symbol;Acc:MGI:1917459]                                                 | 8.8  | 8.7  | 9.1  | 9.1  | 1.3  |
| ENSMUSG0000049526 | Tmem202  | transmembrane protein 202 [Source:MGI Symbol;Acc:MGI:1921143]                                                 | 4.8  | 4.7  | 5.3  | 5.3  | 1.5  |
| ENSMUSG0000048572 | Tmem252  | transmembrane protein 252 [Source:MGI Symbol;Acc:MGI:3583948]                                                 | 11.7 | 11.7 | 11.0 | 10.9 | -1.8 |
| ENSMUSG0000005628 | Tmod4    | tropomodulin 4 [Source:MGI Symbol;Acc:MGI:1355285]                                                            | 6.0  | 5.9  | 5.4  | 5.5  | -1.4 |

|                   |         |                                                                                                       |      |      |      |      |      |
|-------------------|---------|-------------------------------------------------------------------------------------------------------|------|------|------|------|------|
| ENSMUSG0000032268 | Tmprss5 | transmembrane protease, serine 5 (spinesin) [Source:MGI Symbol;Acc:MGI:1933407]                       | 5.6  | 5.6  | 5.2  | 5.1  | -1.4 |
| ENSMUSG0000073400 | Trim10  | tripartite motif-containing 10 [Source:MGI Symbol;Acc:MGI:1338757]                                    | 6.6  | 7.4  | 4.6  | 4.3  | -6.0 |
| ENSMUSG0000035601 | Trmt10b | tRNA methyltransferase 10B [Source:MGI Symbol;Acc:MGI:1917184]                                        | 8.5  | 8.5  | 8.8  | 8.9  | 1.3  |
| ENSMUSG0000025272 | Tro     | trophinin [Source:MGI Symbol;Acc:MGI:1928994]                                                         | 7.4  | 7.5  | 7.8  | 7.8  | 1.3  |
| ENSMUSG0000022510 | Trp63   | transformation related protein 63 [Source:MGI Symbol;Acc:MGI:1330810]                                 | 5.8  | 6.0  | 5.3  | 5.3  | -1.5 |
| ENSMUSG0000027716 | Trpc3   | transient receptor potential cation channel, subfamily C, member 3 [Source:MGI Symbol;Acc:MGI:109526] | 8.6  | 8.7  | 8.1  | 7.9  | -1.6 |
| ENSMUSG0000022388 | Ttl8    | tubulin tyrosine ligase-like family, member 8 [Source:MGI Symbol;Acc:MGI:1922902]                     | 6.5  | 6.5  | 6.2  | 6.1  | -1.3 |
| ENSMUSG0000062380 | Tubb3   | tubulin, beta 3 class III [Source:MGI Symbol;Acc:MGI:107813]                                          | 7.7  | 7.7  | 7.1  | 7.3  | -1.4 |
| ENSMUSG0000034485 | Uaca    | uveal autoantigen with coiled-coil domains and ankyrin repeats [Source:MGI Symbol;Acc:MGI:1919815]    | 13.0 | 12.9 | 12.6 | 12.5 | -1.3 |
| ENSMUSG0000027300 | Ubox5   | U box domain containing 5 [Source:MGI Symbol;Acc:MGI:2154658]                                         | 8.6  | 8.7  | 9.1  | 9.2  | 1.4  |
| ENSMUSG0000020099 | Unc5b   | unc-5 homolog B (C. elegans) [Source:MGI Symbol;Acc:MGI:894703]                                       | 11.8 | 11.7 | 11.4 | 11.3 | -1.3 |
| ENSMUSG0000037989 | Wnk2    | WNK lysine deficient protein kinase 2 [Source:MGI Symbol;Acc:MGI:1922857]                             | 7.5  | 7.4  | 6.9  | 6.6  | -1.6 |
| ENSMUSG0000048728 | Zfp454  | zinc finger protein 454 [Source:MGI Symbol;Acc:MGI:2679253]                                           | 6.2  | 6.1  | 6.7  | 6.7  | 1.4  |
| ENSMUSG0000055202 | Zfp811  | zinc finger protein 811 [Source:MGI Symbol;Acc:MGI:2682944]                                           | 4.4  | 4.3  | 5.5  | 5.1  | 2.0  |

**Table S3. List of Fluidigm and Biolegend antibodies used for mass immunophenotyping**

|    | <b>Metal</b> | <b>Target</b>                        |
|----|--------------|--------------------------------------|
| 1  | 89Y          | CD45                                 |
| 2  | 141Pr        | CCR6                                 |
| 3  | 142Nd        | CD19                                 |
| 4  | 143Nd        | anti-CX3CR1-biotin + anti-biotin-143 |
| 5  | 144Nd        | CD11b                                |
| 6  | 145Nd        | CD4                                  |
| 7  | 146Nd        | IgD                                  |
| 8  | 147Sm        | CD11c                                |
| 9  | 148Nd        | CD16                                 |
| 10 | 149Sm        | CD127                                |
| 11 | 150Nd        | CD86                                 |
| 12 | 151Eu        | HLA-DR                               |
| 13 | 152Sm        | CD21                                 |
| 14 | 153Eu        | CXCR5                                |
| 15 | 154Sm        | TIGIT                                |
| 16 | 155Gd        | PD-1                                 |
| 17 | 156Gd        | CXCR3                                |
| 18 | 158Gd        | CCR4                                 |
| 19 | 159Tb        | CCR7                                 |
| 20 | 160Gd        | CD14                                 |
| 21 | 162Dy        | CD27                                 |
| 22 | 163Dy        | CD34                                 |
| 23 | 164Dy        | CD45RO                               |
| 24 | 165Ho        | anti-CD133-PE + anti-PE              |
| 25 | 166Er        | CD24                                 |
| 26 | 167Er        | CD38                                 |
| 27 | 168Er        | CD8                                  |
| 28 | 169Tm        | CD25                                 |
| 29 | 170Er        | CD3                                  |
| 30 | 171Yb        | CD68                                 |
| 31 | 172Yb        | IgM                                  |
| 32 | 173Yb        | CXCR4                                |
| 33 | 174Yb        | anti-CCR2-FITC + anti-FITC           |
| 34 | 175Lu        | Rabbit anti-BTK + anti-rabbit IgG    |
| 35 | 176Yb        | anti-CD28-APC + anti-APC             |
| 36 | 191/193      | Nucleic acid Intercalator            |
| 37 | 198Pt        | Cisplatin                            |

**Table S4. Immuno cell type surface markers used in the CyTOF study**

| POPULATION                                                                                                   | PHENOTYPE                                              |
|--------------------------------------------------------------------------------------------------------------|--------------------------------------------------------|
|  CD16+ NK Cells             | CD16+ CD14- HLADR-                                     |
|  CD16- NK Cells             | CD16- CD14- HLADR-                                     |
|  Non-Classical Monocytes    | CD16+CD14 <sup>lo</sup> HLA-DR+CD11b+CD4 <sup>lo</sup> |
|  Classical Monocytes        | CD16-CD14+HLA-DR+CD11b <sup>hi</sup> CD4 <sup>lo</sup> |
|  Island 1                   | CD25+CD38+CD45RO+                                      |
|  mDCs                       | CD14-CD16-HLA-DR+CD11c+CD4 <sup>lo</sup>               |
|  pDCs                       | CD14-CD16-HLA-DR+CD11c-CD4 <sup>lo</sup>               |
|  Plasmablasts               | CD19+CD38 <sup>HI</sup> CD27 <sup>HI</sup>             |
|  Island 5                   | CD38+CD27+TIGIT+CD16 <sup>lo</sup>                     |
|  Island 6                   | CD38+CD27+CXCR3+CD11c+CD11b+                           |
|  Island 7                   | CD25+CD27+CCR4+CD127+                                  |
|  Naive B Cells              | CD19+CD27-IgD+                                         |
|  US Memory B Cells          | CD19+CD27-IgD+CD133+CCR7+                              |
|  CD133+ Island 2            | CD19+CD21+IgD+IgM+CD133+                               |
|  CD133+ Island 3            | CD19+CD21+IgD+IgM+CCR6+CD133+                          |
|  T and B Cell Doublets      | CD3+CD8+CD19+                                          |
|  DP T Cells (Memory)      | CD3+CD4+CD8+CD45RO+CCR7-                               |
|  DP T Cells (2) (Naive)   | CD3+CD4+CD8+CD45RO-CCR7+                               |
|  HSCs                     | CD133+CD34+CD38+CD45 <sup>lo</sup>                     |
|  CD8+ Tnaive Cels         | CD3+CD8+CD45RO-CCR7+                                   |
|  CD8+ Tcm Cells           | CD3+CD8+CD45RO+CCR7+                                   |
|  CS Memory B Cells        | CD19+CD27+IgD-                                         |
|  CD8+ Tem Cells           | CD3+CD8+CD45RO+CCR7-                                   |
|  CD8+ Temra Cells         | CD3+CD8+CD45RO-CCR7-                                   |
|  CD4+ Tnaive Cells        | CD3+CD4+CD45RO-CCR7+                                   |
|  CD4+ Tcm Cells           | CD3+CD4+CD45RO+CCR7+                                   |
|  CD4+ Tem Cells           | CD3+CD4+CD45RO+CCR7-                                   |
|  Tfh Cells                | CD3+CD4+CXCR5+PD1+                                     |
|  Naive DN T Cells(TCRgd)  | CD3+CD4-CD8-CD45RO-CCR7+                               |
|  Memory DN T Cells(TCRgd) | CD3+CD4-CD8-CD45RO+CCR7-                               |
|  CD8+ Tem Cells (2)       | CD3+CD8+CD45RO+CCR7-                                   |
|  CD8+ Temra Cells (2)     | CD3+CD8+CD45RO-CCR7-                                   |

**Table S5. Demographics of volunteers/patients served in the CyTOF study**

| Clinical subjects               | Age | Sex  |
|---------------------------------|-----|------|
| Healthy Volunteer 1             | 7   | Male |
| Healthy Volunteer 2             | 13  | Male |
| PAH patient with KCNK3 mutation | 9   | Male |
| PAH patient with KCNK3 mutation | 11  | Male |



**Table S6. List of antibodies used in conventional flow cytometry**

| <b>ThermoFisher Scientific</b>                                        | <b>Catalog details</b> |
|-----------------------------------------------------------------------|------------------------|
| eBioscience™ Mouse Hematopoietic Lineage Biotin Panel                 | 88-7774-75             |
| eBioscience™ Streptavidin eFluor™ 450 Conjugate                       | 48-4317-82             |
| Ly-6A/E (Sca-1) Monoclonal Antibody (D7), PE, eBioscience™            | 12-5981-82             |
| CD117 (c-Kit) Monoclonal Antibody (2B8), APC-eFluor 780, eBioscience™ | 47-1171-82             |
| CD135 (Flt3) Monoclonal Antibody (A2F10), PE-Cyanine5, eBioscience™   | 15-1351-82             |
| CD34 Monoclonal Antibody (RAM34), eFluor 660, eBioscience™            | 50-0341-82             |
| CD16/CD32 Monoclonal Antibody (93), PE-Cyanine7, eBioscience™         | 25-0161-82             |
| Ly-6G/Ly-6C Monoclonal Antibody (RB6-8C5), PE-Cyanine7, eBioscience™  | 25-5931-82             |
| CD11b Monoclonal Antibody (M1/70), PE, eBioscience™                   | 12-0112-82             |
| CD4 Monoclonal Antibody (RM4-5), eFluor 450, eBioscience™             | 48-0042-82             |
| CD8a Monoclonal Antibody (53-6.7), APC-eFluor 780, eBioscience™       | 47-0081-82             |
| CD45R (B220) Monoclonal Antibody (RA3-6B2), APC, eBioscience™         | 17-0452-82             |

**Table S7. Surface Master Mix**

| <b>Conjugate</b>      | <b>Target</b> | <b>Clone</b> | <b>Vendor</b> | <b>Volume/test (uL)</b> |
|-----------------------|---------------|--------------|---------------|-------------------------|
| 89Y                   | CD45          | HI30         | Fluidigm      | 0.25                    |
| 141Pr                 | CCR6          | G034E3       | Fluidigm      | 1.25                    |
| 142Nd                 | CD19          | HIB19        | Fluidigm      | 0.25                    |
| Biotin                | CX3CR1        | 2A91         | Biolegend     | 2                       |
| 144Nd                 | CD11b         | ICRF44       | Fluidigm      | 0.1                     |
| 145Nd                 | CD4           | RPA-T4       | Fluidigm      | 0.25                    |
| 146Nd                 | IgD           | IA6-2        | Fluidigm      | 0.1                     |
| 147Sm                 | CD11c         | Bu15         | Fluidigm      | 0.25                    |
| 148Nd                 | CD16          | 3G8          | Fluidigm      | 0.25                    |
| 149Sm                 | CD127         | A019D5       | Fluidigm      | 2.5                     |
| 150Nd                 | CD86          | IT2.2        | Fluidigm      | 1.5                     |
| 151Eu                 | HLA-DR        | G46-6        | Fluidigm      | 0.1                     |
| 152Sm                 | CD21          | BL13         | Fluidigm      | 1                       |
| 153Eu                 | CXCR5         | RF8B2        | Fluidigm      | 1                       |
| 154Sm                 | TIGIT         | MBSA43       | Fluidigm      | 1                       |
| 155Gd                 | PD-1          | EH12.2H7     | Fluidigm      | 2                       |
| 156Gd                 | CXCR3         | G025H7       | Fluidigm      | 2                       |
| 158Gd                 | CCR4          | L291H4       | Fluidigm      | 1                       |
| 159Tb                 | CCR7          | G043H7       | Fluidigm      | 0.75                    |
| 160Gd                 | CD14          | M5E2         | Fluidigm      | 1                       |
| 162Dy                 | CD27          | L128         | Fluidigm      | 0.5                     |
| 163Dy                 | CD34          | 581          | Fluidigm      | 1                       |
| 164Dy                 | CD45RO        | UCHL1        | Fluidigm      | 0.5                     |
| PE                    | CD133         | clone 7      | Biolegend     | 2                       |
| 166Er                 | CD24          | ML5          | Fluidigm      | 1.5                     |
| 167Er                 | CD38          | HIT2         | Fluidigm      | 0.5                     |
| 168Er                 | CD8           | SKI1         | Fluidigm      | 0.05                    |
| 169Tm                 | CD25          | 2A3          | Fluidigm      | 0.5                     |
| 170Er                 | CD3           | UCHT1        | Fluidigm      | 0.25                    |
| 172Yb                 | IgM           | MHM-88       | Fluidigm      | 0.1                     |
| 173Yb                 | CXCR4         | 12G5         | Fluidigm      | 1                       |
| APC                   | CD28          | CD28.2       | Biolegend     | 2                       |
| PBS/1% BSA            |               |              |               | 71.55                   |
| <b>Total Per Test</b> |               |              |               | <b>100</b>              |

**Table S8. Mouse Cytokine Array coordinates**

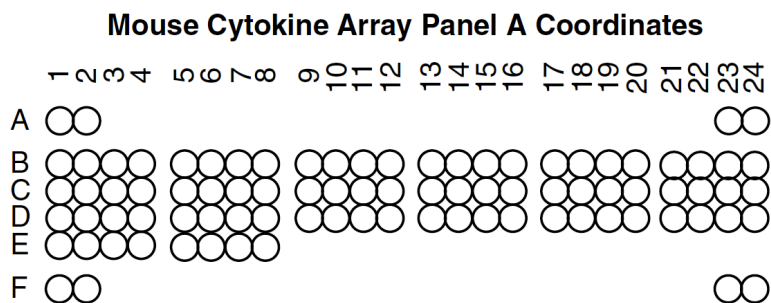

| Coordinate | Target         | Alternate Nomenclature  |
|------------|----------------|-------------------------|
| A1, A2     | Reference Spot | -                       |
| A23, A24   | Reference Spot | -                       |
| B1, B2     | BLC            | CXCL13/BCA-1            |
| B3, B4     | C5/C5a         | Complement Component 5a |
| B5, B6     | G-CSF          | -                       |
| B7, B8     | GM-CSF         | -                       |
| B9, B10    | I-309          | CCL1/TCA-3              |
| B11, B12   | Eotaxin        | CCL11                   |
| B13, B14   | sICAM-1        | CD54                    |
| B15, B16   | IFN- $\gamma$  | -                       |
| B17, B18   | IL-1 $\alpha$  | IL-1F1                  |
| B19, B20   | IL-1 $\beta$   | IL-1F2                  |
| B21, B22   | IL-1ra         | IL-1F3                  |
| B23, B24   | IL-2           | -                       |
| C1, C2     | IL-3           | -                       |
| C3, C4     | IL-4           | -                       |
| C5, C6     | IL-5           | -                       |
| C7, C8     | IL-6           | -                       |
| C9, C10    | IL-7           | -                       |
| C11, C12   | IL-10          | -                       |
| C13, C14   | IL-13          | -                       |
| C15, C16   | IL-12 p70      | -                       |
| C17, C18   | IL-16          | -                       |
| C19, C20   | IL-17          | -                       |
| C21, C22   | IL-23          | -                       |
| C23, C24   | IL-27          | -                       |

|          |                        |              |
|----------|------------------------|--------------|
| D1, D2   | IP-10                  | CXCL10/CRG-2 |
| D3, D4   | I-TAC                  | CXCL11       |
| D5, D6   | KC                     | CXCL1        |
| D7, D8   | M-CSF                  | -            |
| D9, D10  | JE                     | CCL2/MCP-1   |
| D11, D12 | MCP-5                  | CCL12        |
| D13, D14 | MIG                    | CXCL9        |
| D15, D16 | MIP-1 $\alpha$         | CCL3         |
| D17, D18 | MIP-1 $\beta$          | CCL4         |
| D19, D20 | MIP-2                  | CXCL2        |
| D21, D22 | RANTES                 | CCL5         |
| D23, D24 | SDF-1                  | CXCL12       |
| E1, E2   | TARC                   | CCL17        |
| E3, E4   | TIMP-1                 | -            |
| E5, E6   | TNF- $\alpha$          | -            |
| E7, E8   | TREM-1                 | -            |
| F1, F2   | Reference Spot         | -            |
| F23, F24 | PBS (Negative Control) | Control (-)  |

**Table S9. Secondary Surface Master Mix**

| Conjugate             | Target | Clone  | Vendor   | Volume/test (uL) |
|-----------------------|--------|--------|----------|------------------|
| 143Nd                 | Biotin | ID4-C5 | Fluidigm | 2                |
| 165Ho                 | PE     | PE001  | Fluidigm | 1                |
| 176Yb                 | APC    | APC003 | Fluidigm | 1                |
| PBS/1% BSA            |        |        |          | 96               |
| <b>Total Per Test</b> |        |        |          | <b>100</b>       |

**Table S10. Primary Intracellular Master Mix**

| Conjugate             | Target          | Clone  | Vendor         | Volume/test (uL) |
|-----------------------|-----------------|--------|----------------|------------------|
| 171Yb                 | CD68            | Y1/82A | Fluidigm       | 1                |
| FITC                  | CCR2            | K036C2 | Biolegend      | 1                |
| ---                   | Rabbit anti-BTK | D3H5   | Cell Signaling | 0.5              |
| Fix/Perm Buffer       |                 |        |                | 97.5             |
| <b>Total Per Test</b> |                 |        |                | <b>100</b>       |

**Table S11. Secondary Intracellular Master Mix**

| Conjugate             | Target               | Clone      | Vendor   | Volume/test (uL) |
|-----------------------|----------------------|------------|----------|------------------|
| 174Yb                 | anti-FITC            | FIT-22     | Fluidigm | 0.2              |
| 175Lu                 | Goat anti-Rabbit IgG | Polyclonal | Fluidigm | 0.5              |
| Fix/Perm Buffer       |                      |            |          | 99.3             |
| <b>Total Per Test</b> |                      |            |          | <b>100</b>       |
